# Supplementary material
Source: PubMed Central journal article supplement (PMC6148441)
Supplement: ja8b06526_si_001.pdf [file ja8b06526_si_001.pdf]

## Supporting Information

# **DNA-Guided Plasmonic Helix with Switchable Chirality**

Xiang Lan,<sup>1,2</sup> Tianji Liu,<sup>3,4</sup> Zhiming Wang,<sup>4</sup> Alexander O. Govorov,<sup>3</sup> Hao Yan,<sup>1,2</sup> Yan Liu<sup>1,2</sup>

<sup>1</sup>Center for Molecular Design and Biomimetics, The Biodesign Institute, Arizona State University, Tempe, AZ 85287, USA

<sup>2</sup>School of Molecular Sciences, Arizona State University, Tempe, AZ 85287, USA

<sup>3</sup>Department of Physics and Astronomy, Ohio University, Athens, Ohio 45701, USA

<sup>4</sup>Institute of Fundamental and Frontier Sciences, University of Electronic Science and Technology of China, Chengdu 610054, China

### Note S1. Experimental methods

Basically, we followed our previously-published protocols<sup>1</sup> for self-assembly of DNA origami, conjugation of gold nanorods to DNA origami, self-assembly of gold nanorod superstructures and CD measurements. Table S1 presents the detailed annealing procedures for different experiment steps in this work.

**Table S1.** Annealing conditions for different steps of experiment.

| Experiment                            | Temperature         | Rate      | Cycle |
|---------------------------------------|---------------------|-----------|-------|
| Self-assembly of DNA origami          | From 65 °C to 25 °C | 1 h/°C    | NA    |
| Attachment of AuNRs onto DNA origami  | From 45 °C to 30 °C | 10 min/°C | 4     |
| Self-assembly of AuNR superstructures | From 45°C to 30 °C  | 3 h/°C    | NA    |
| Reconfiguration 1                     | From 45 °C to 30 °C | 1 h/°C    | NA    |
| Reconfiguration 2                     | From 37 °C to 25 °C | 10 min/°C | 4     |

Reconfiguration 1 is for the conversion of AuNR superstructure between the folded state and the extended state.

Reconfiguration 2 is for the chirality inversion of the AuNR superstructure.

**Table S2.** Plasmon treatments for different hydrophilicities of the TEM grid surface.

| Surface       | Current /mA | Time /s | Membrane |
|---------------|-------------|---------|----------|
| Strong charge | 45          | 30      | Formvar  |
| Weak charge   | 30          | 20      | Carbon   |

**Table S3.** Condition for obtaining a negative or positive staining of the DNA structures.

| UF staining   | Negative | Positive |
|---------------|----------|----------|
| Aqueous layer | With     | Without  |

Aqueous layer means that a thin layer of 2% uranyl formate solution was left on the TEM grid surface after staining for 30 s.

## Note S2. Simulation techniques

Extinction and CD spectra were obtained by utilizing a commercial software package (FDTD solutions, Lumerical Inc.). Using a perfectly matched layer (PML) as the boundary conditions, the CD spectra were respectively calculated and averaged in the  $\pm x$ ,  $\pm y$ , and  $\pm z$  directions. Balancing the need for accuracy in the calculations with computational time and memory requirements, the mesh sizes were specified as 1 nm in the  $x$ ,  $y$ , and  $z$  directions. To better address the curved surface of the AuNR, the mesh sizes were further refined with the Yu-Mittra method<sup>2</sup>. Additionally, due to the inhomogeneous broadening effect that originated from the polydispersity in the superstructures, the dielectric function of the Au was modified and followed the methods used in our previous approach<sup>3</sup>:

$$\varepsilon_{\text{Au}}(\omega) = \varepsilon_{\text{bulk Au}}(\omega) + \frac{\omega_p^2}{\omega^2 + i\omega\Gamma_{\text{bulk Au}}} - \frac{\omega_p^2}{\omega^2 + i\omega\Gamma_{\text{bulk Broadened}}}, \quad (1)$$

where  $\varepsilon_{\text{bulk Au}}(\omega)$  denotes the frequency-dependent complex permittivity of bulk gold and the values were taken from the tabulated data<sup>4</sup>.  $\Gamma_{\text{bulk Au}} = 0.076$  eV and  $\omega_p = 8.9$  eV were fitting parameters in the Drude model<sup>5</sup>.  $\Gamma_{\text{bulk Broadened}} = 5 \Gamma_{\text{bulk Au}}$  was a broadened damping parameter that was obtained by fitting the results with the experimental extinction spectra of the individual AuNR.

**Note S3. Additional TEM images of self-assembled AuNR chiral superstructures**

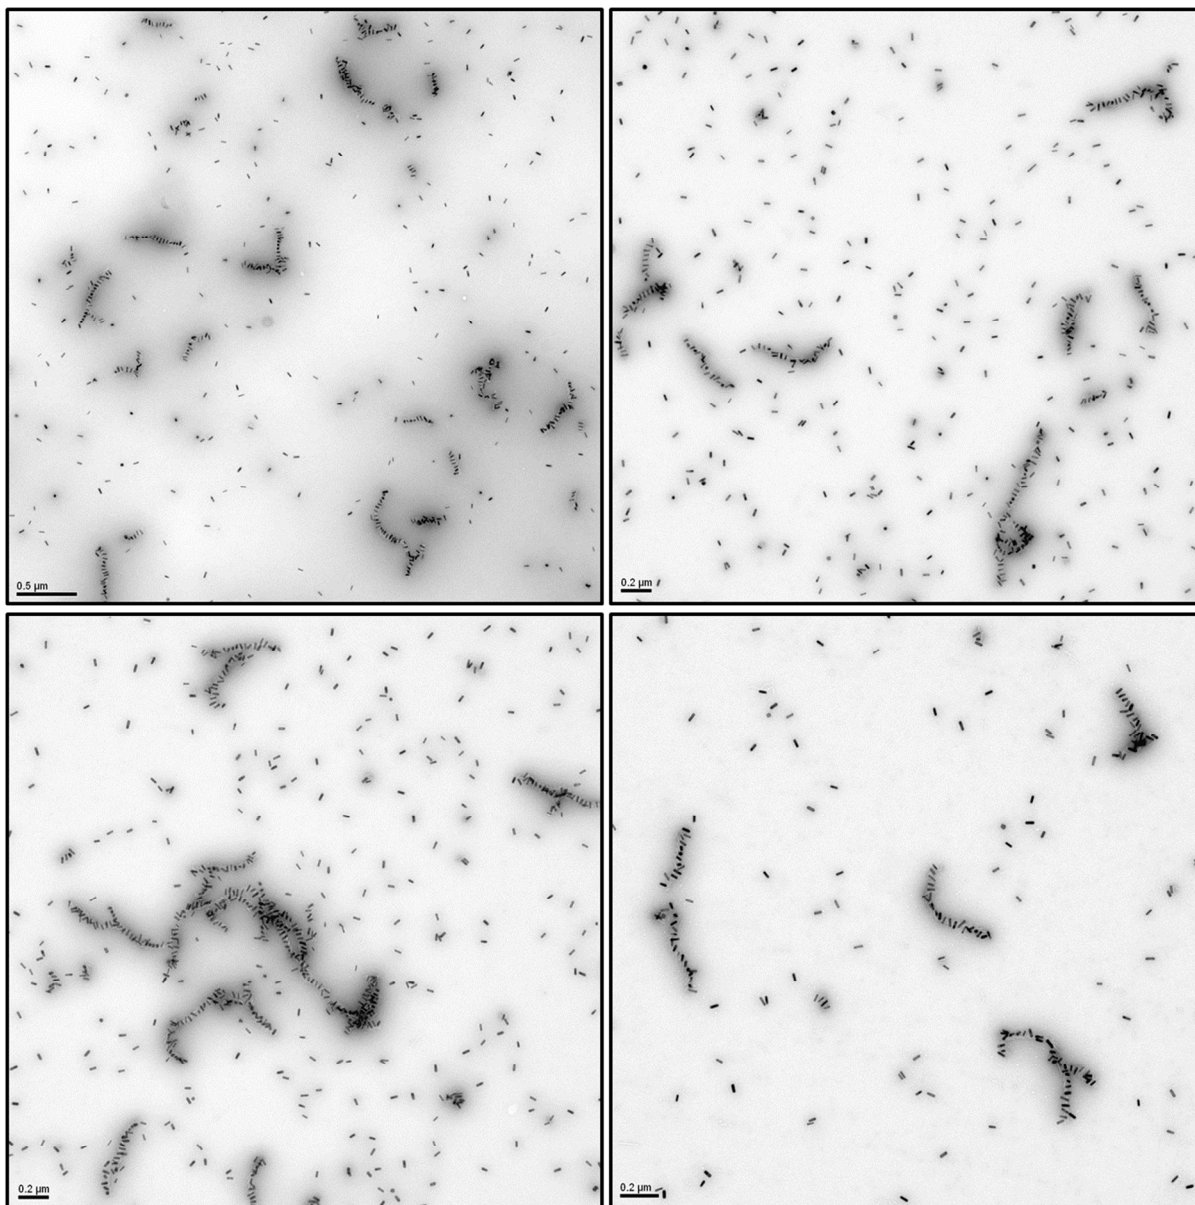

**Figure S1.** Wide field TEM images of left-handed AuNR superstructures. DNA origami in the folded state that are used for the assembly process.

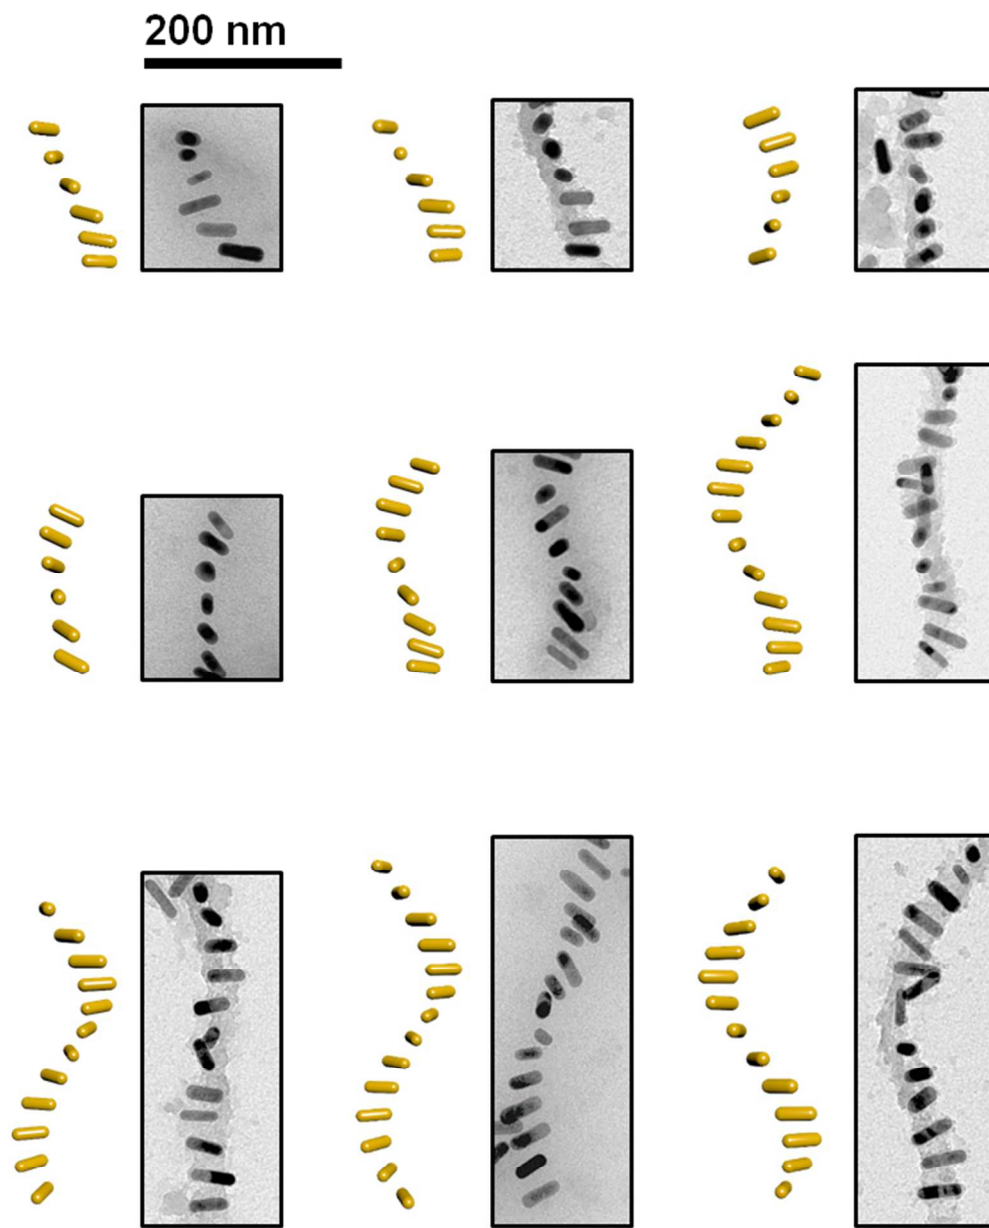

**Figure S2.** Zoomed-in TEM images of individual AuNR superstructures and the corresponding 3D models that have a similar spatial orientation. DNA origami in the folded state was used during the assembly process.

#### Note S4. TEM characterization of monomeric and polymeric DNA origami

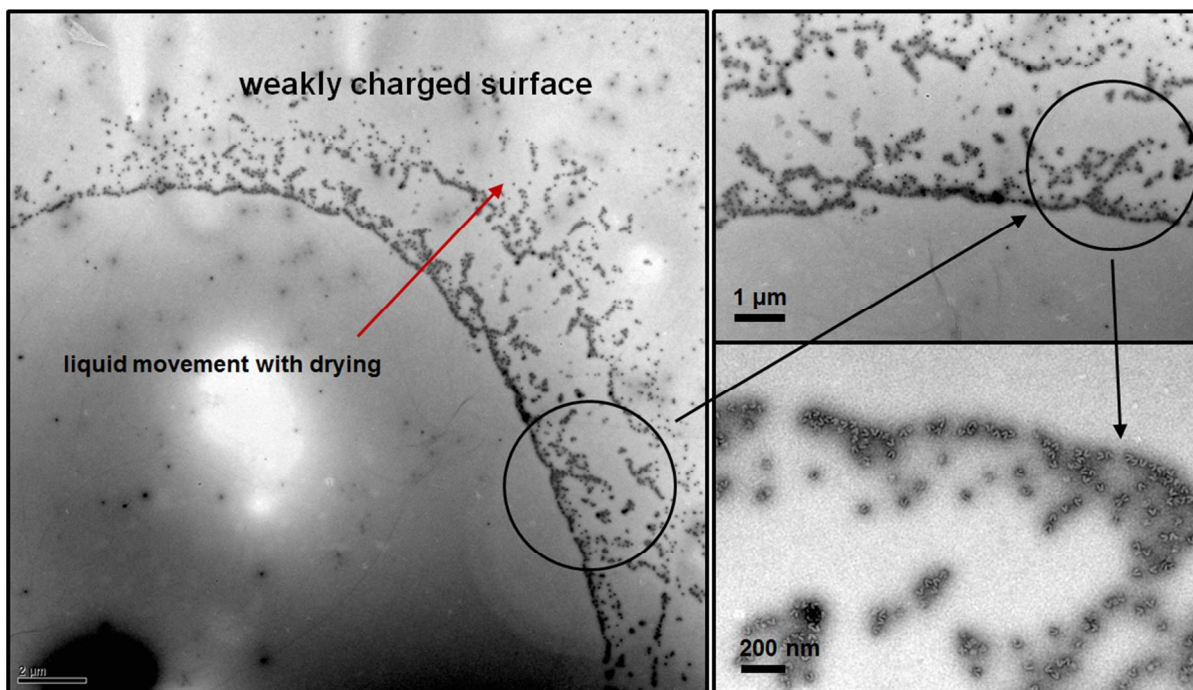

**Figure S3.** These TEM images show the liquid movement while the sample deposited on the surface of a weakly-charged TEM grid was drying. The weak wettability of the surface was due to the low hydrophilicity. The DNA origami prefer to stand up with the ends of the helices in contact with the TEM grid surface.

In this work, the DNA origami (both V-shape and H-shape) has 3 layers of parallel DNA double helix in each arm. The helical ends that have single-stranded scaffold loops are relatively more hydrophobic than the helical sides because of the exposure of the DNA bases. The hydrophobic interactions between DNA blunt ends have been demonstrated in high ion concentrations or at low temperatures.<sup>6</sup>

In our case, although the DNA origami have weak hydrophobic interactions between each other because of the relatively low ion concentrations ( $\sim 6 \text{ mM Mg}^{2+}$ ), the hydrophobicity differences between the helical ends and sides of DNA origami still greatly influence the attachments of the DNA origami on TEM grid surfaces with different treatments, such as glow discharging of the formvar or carbon film (Table S2). The helical sides of the DNA origami with more hydrophilicity were preferentially attached to the strongly charged surfaces (formvar), while the helical ends of the DNA origami with more hydrophobicity were more likely attached to the weakly charged surfaces (carbon). Overall, it is the hydrophilicity variations between the helical sides and helical ends that dominates the different preference of DNA origami attachments on TEM grid surfaces.

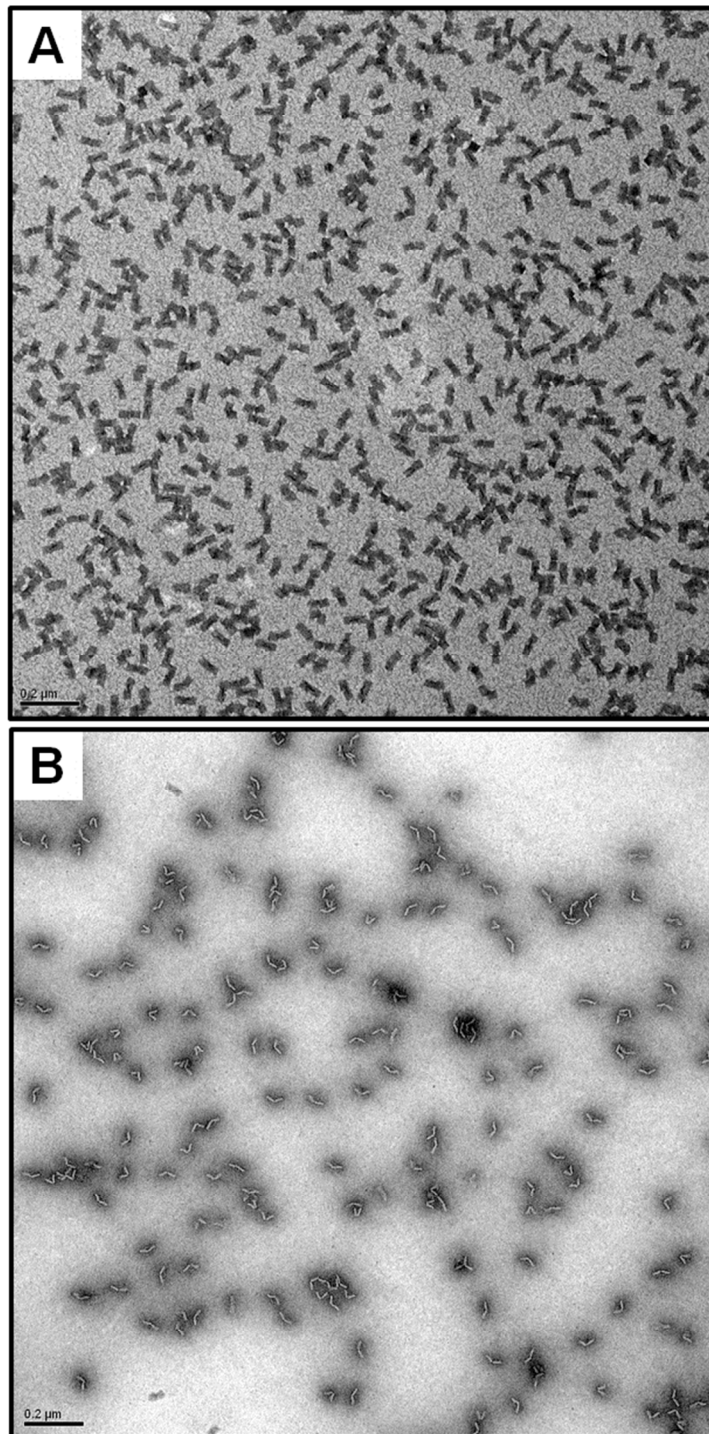

**Figure S4.** The differential attachments of DNA origami on strongly-charged (A) and weakly-charged (B) TEM grid surfaces, respectively. DNA origami in the extended state that were transformed from the folded state are presented here. On the strongly charged grid surface, the DNA origami prefer to lie down with the flat surface of the DNA helical bundle in contact with the surface, while on the weakly charged grid surface, they prefer to stand up with the ends of the DNA helices in contact with the surface.

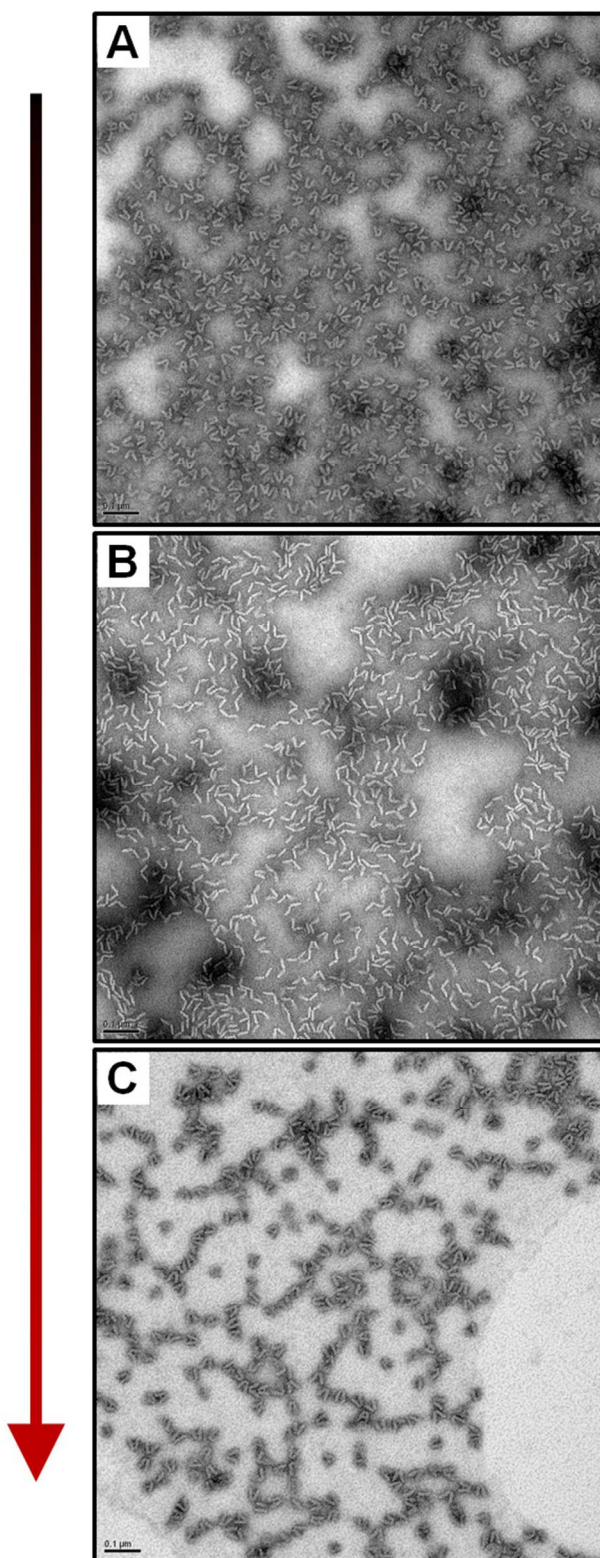

**Figure S5.** A full cycle of structural reconfiguration. The DNA origami's structure was cycled from the folded state to the extended state and back to the folded state.



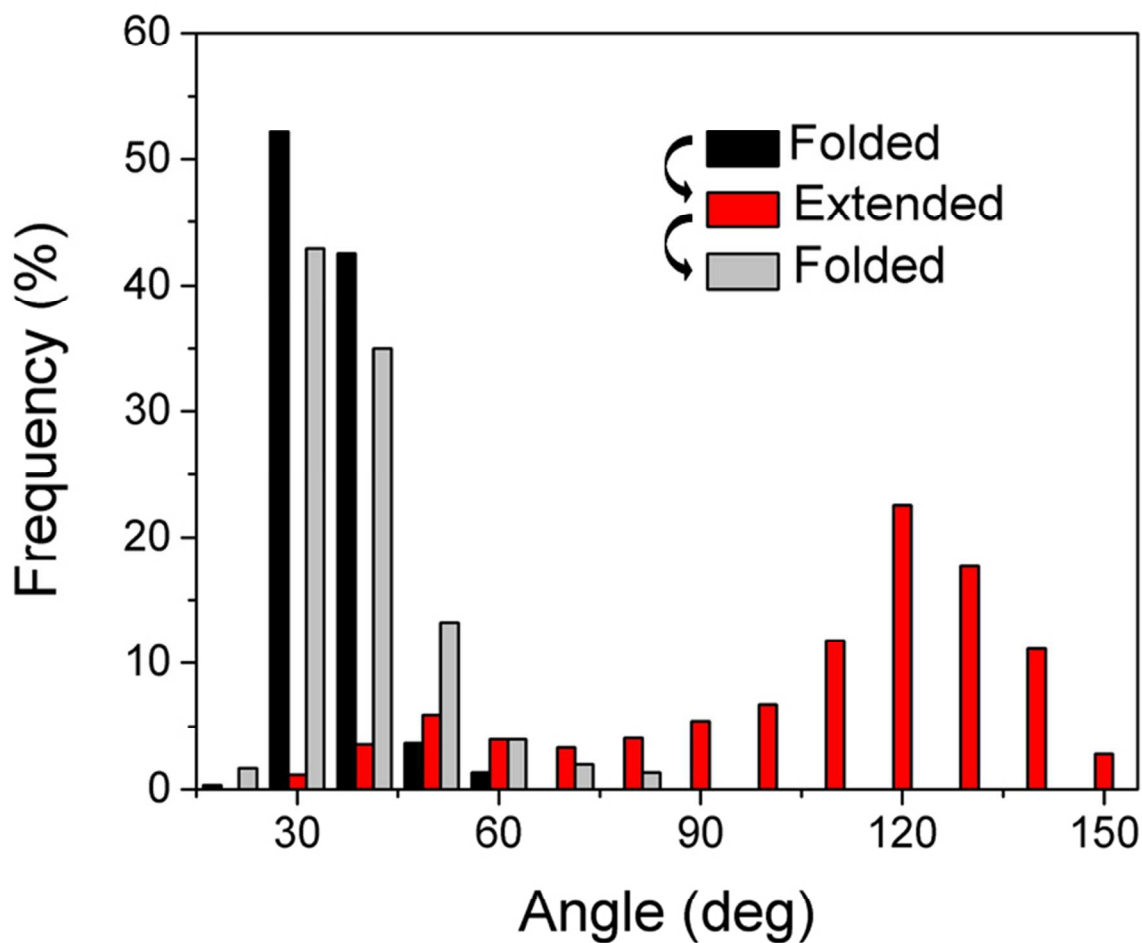

**Figure S6.** Histograms of the inter-arm angle of the DNA origami for a full cycle of conversion between the folded state and the extended state. The yield of the structural conversion was not 100% and some intermediate states were present. 300 and 1000 particles were counted for the folded state and the extended state, respectively.

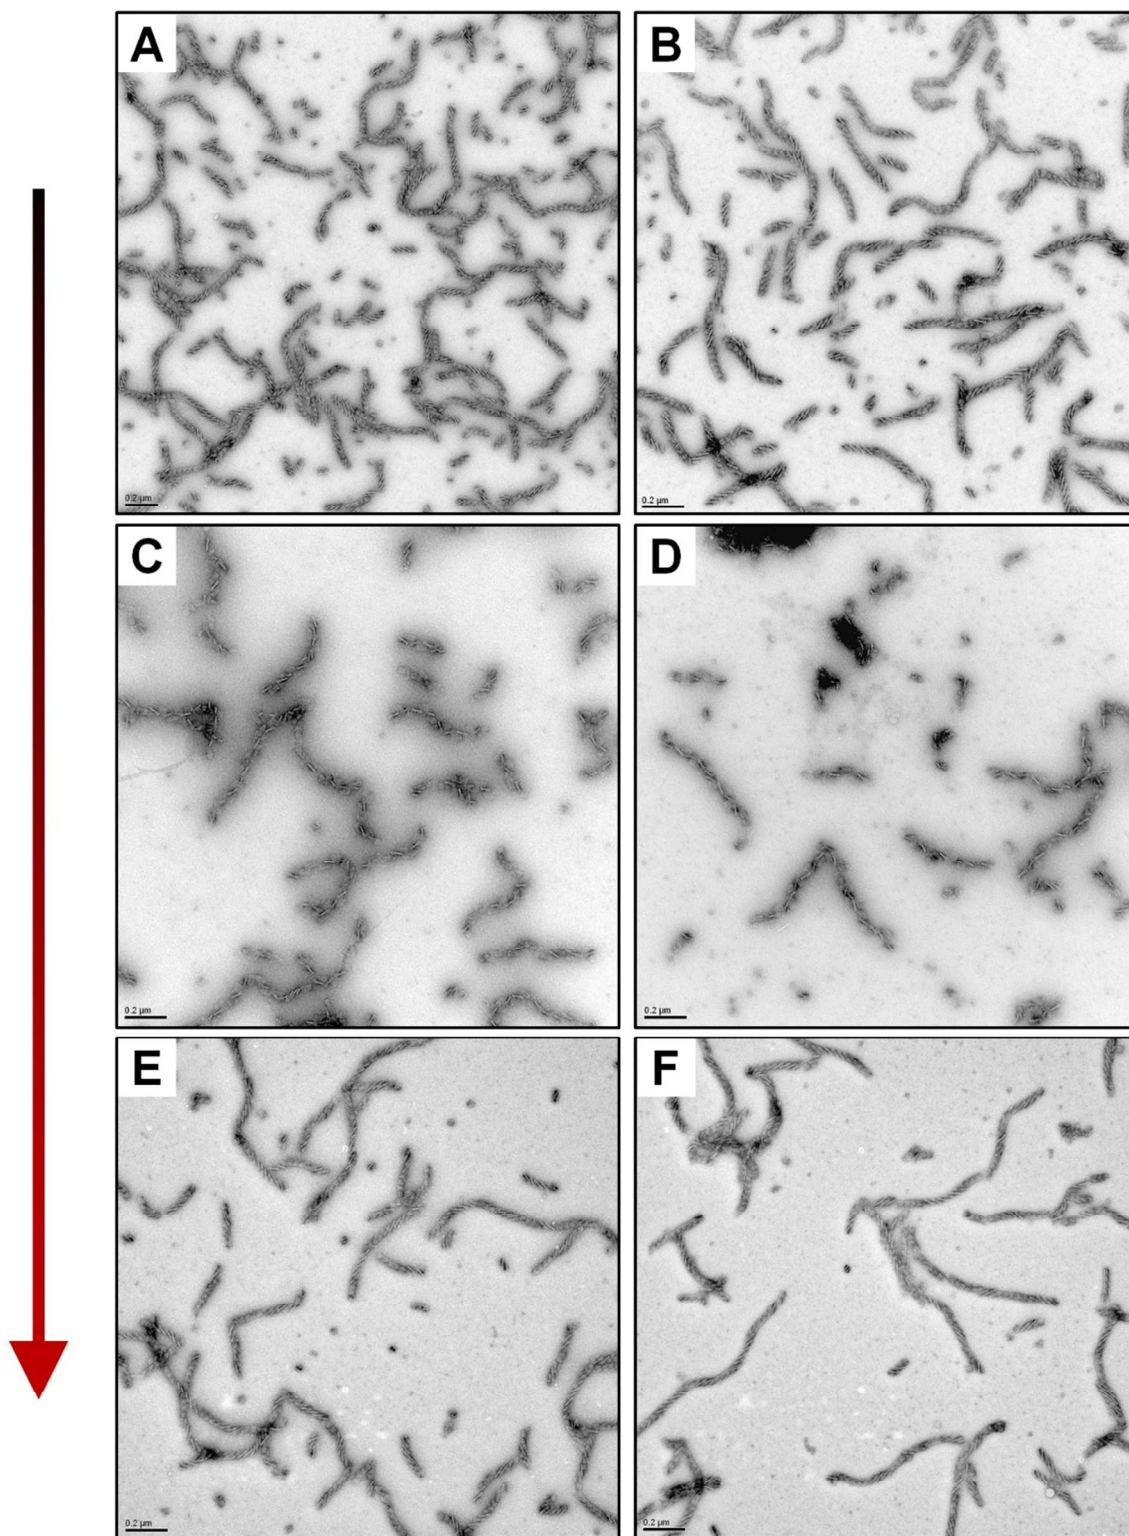

**Figure S7.** These TEM images show a full cycle of DNA origami supramolecular polymer structural reconfiguration. This conversion allowed the DNA origami to change from the folded state to the extended state and back to the folded state. A, B, E, F) the folded state; C, D) the extended state.

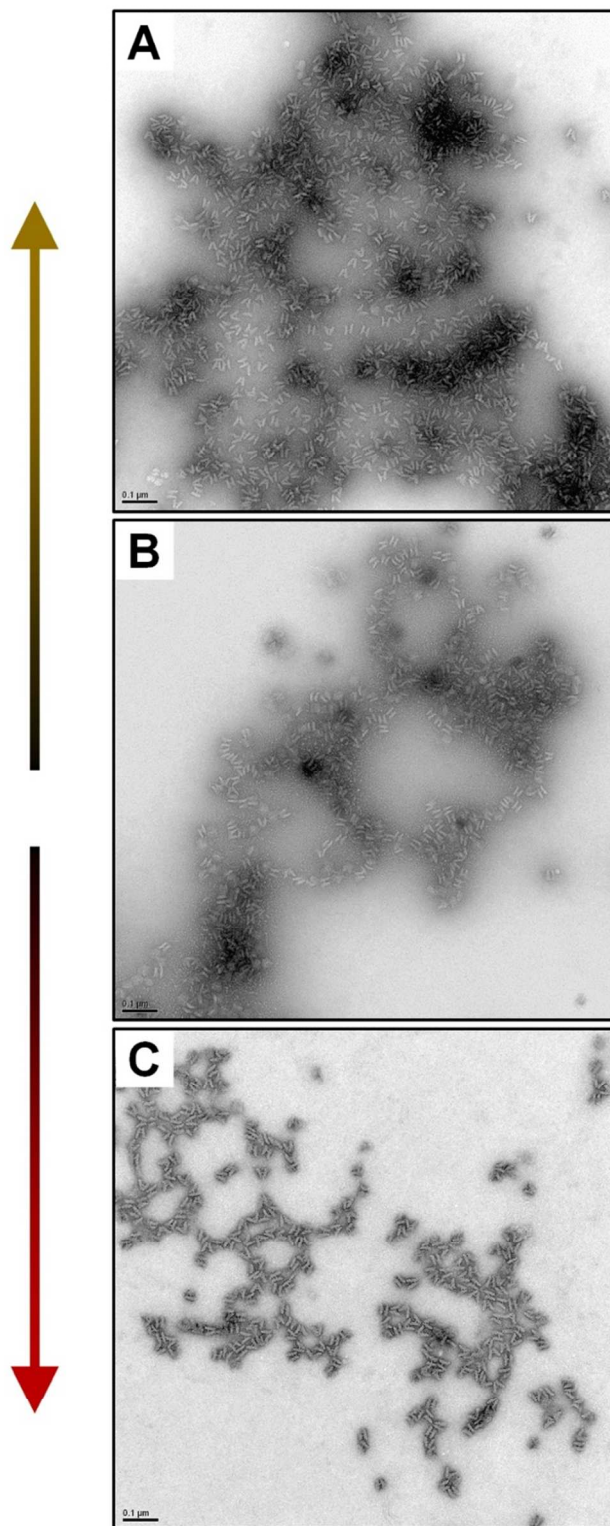

**Figure S8.** The structural reconfiguration from H-shaped origami (B) to two mirror-image V-shaped structures in (A) and (C). A) The monomeric DNA origami that were used for the self-assembly procedures for the left-handed superstructures; C) The monomeric DNA origami that were used for the self-assembly of the right-handed superstructures.

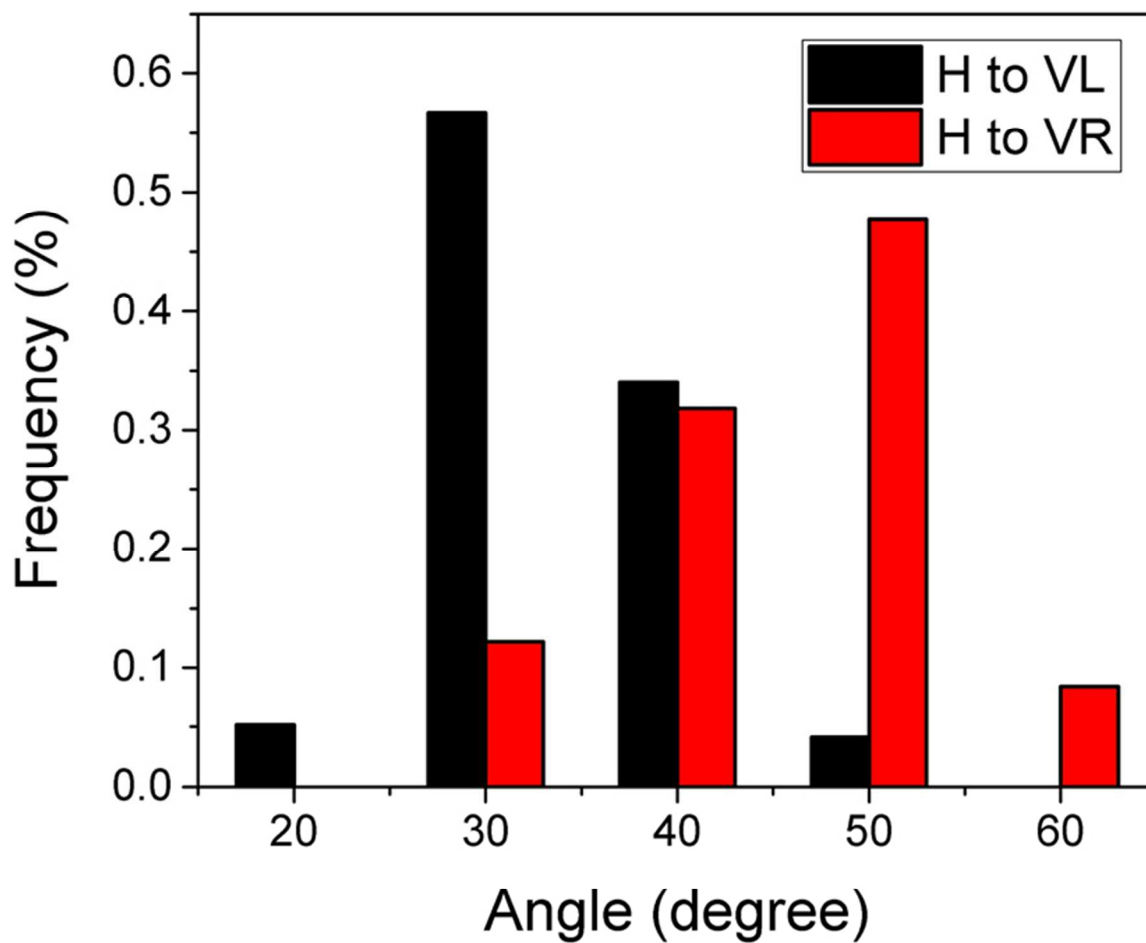

**Figure S9.** Histograms of the inter-arm angle of two V-shaped structures that were transformed from the H-shaped DNA origami. VL and VR denote the monomeric DNA origami for the corresponding left-handed and right-handed superstructures, respectively. 300 particles were counted for both VL and VR.

100 nm

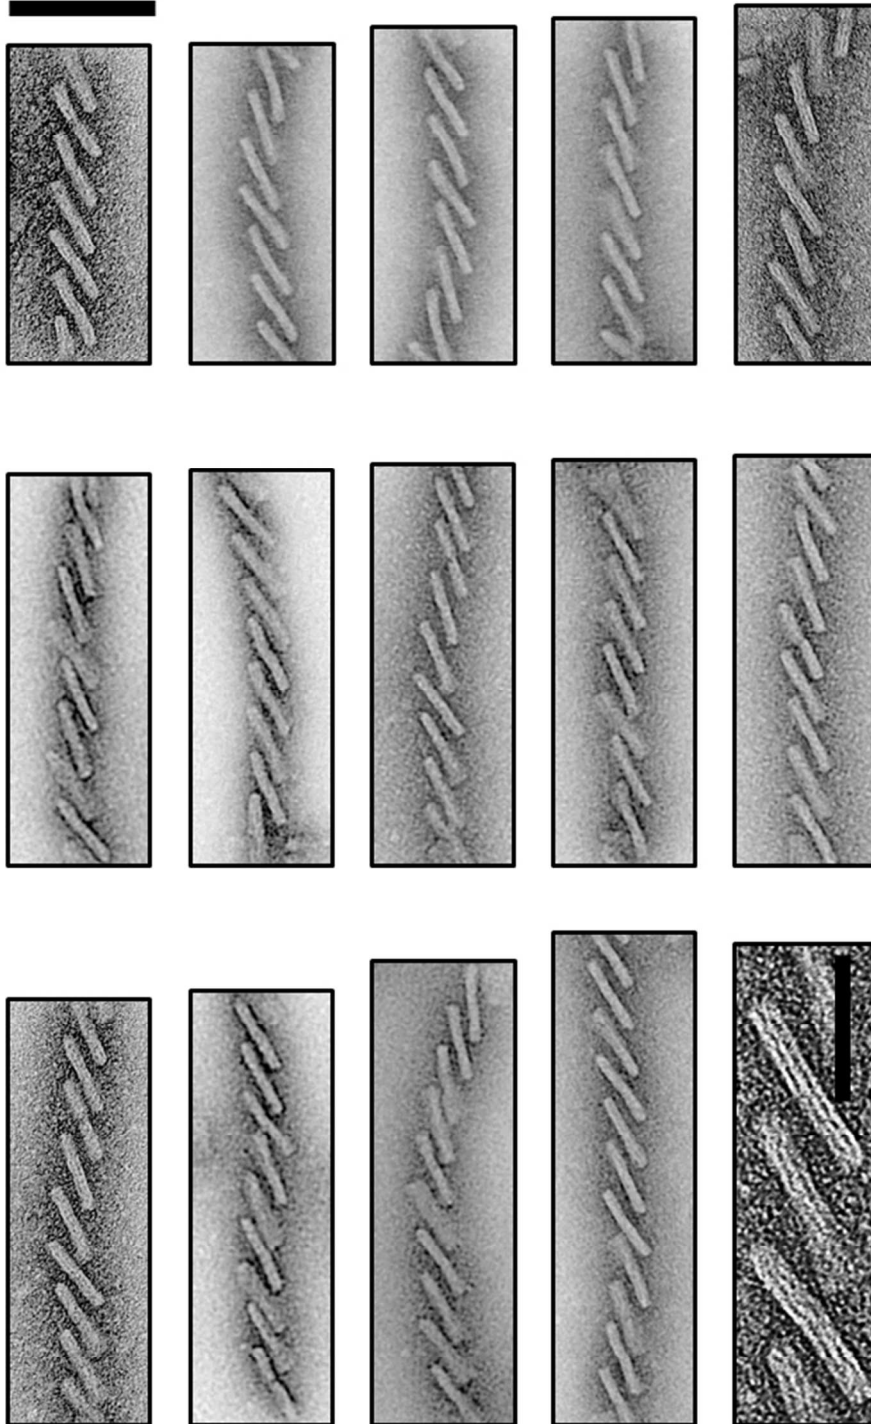

**Figure S10.** A collection of DNA superstructures that were assembled from H-shaped DNA origami monomers. The scale bar in the bottom-right image is 50 nm.

Note S5. Experimental absorption spectra of AuNR superstructures

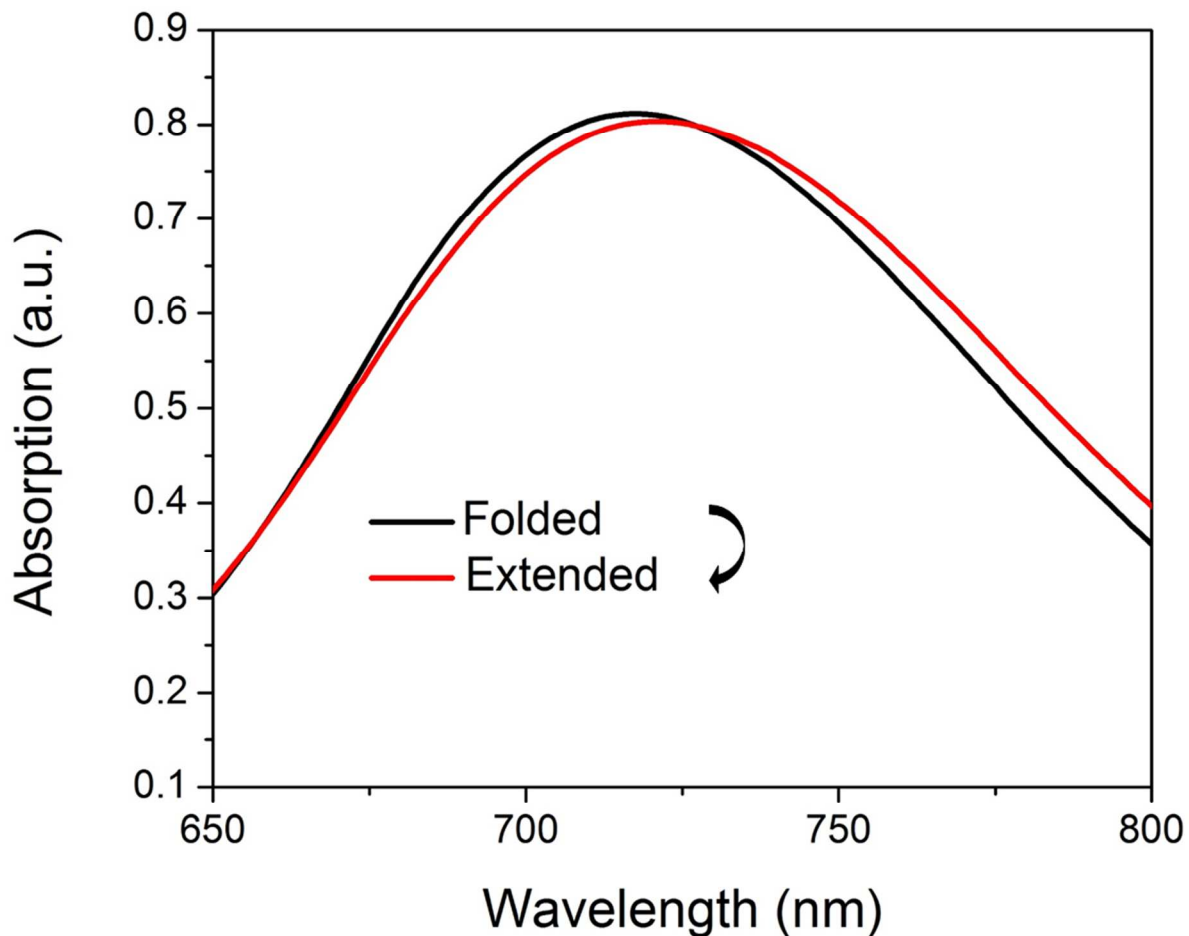

**Figure S11.** The experimental absorption spectra change after a single step reconfiguration of the AuNR superstructures from the folded state to the extended state. A spectral red shift is observed because the dominant plasmon modes was changed from that of an anti-bonding to a bonding mode after the structural reconfiguration. No apparent aggregation was observed from the absorption spectra.

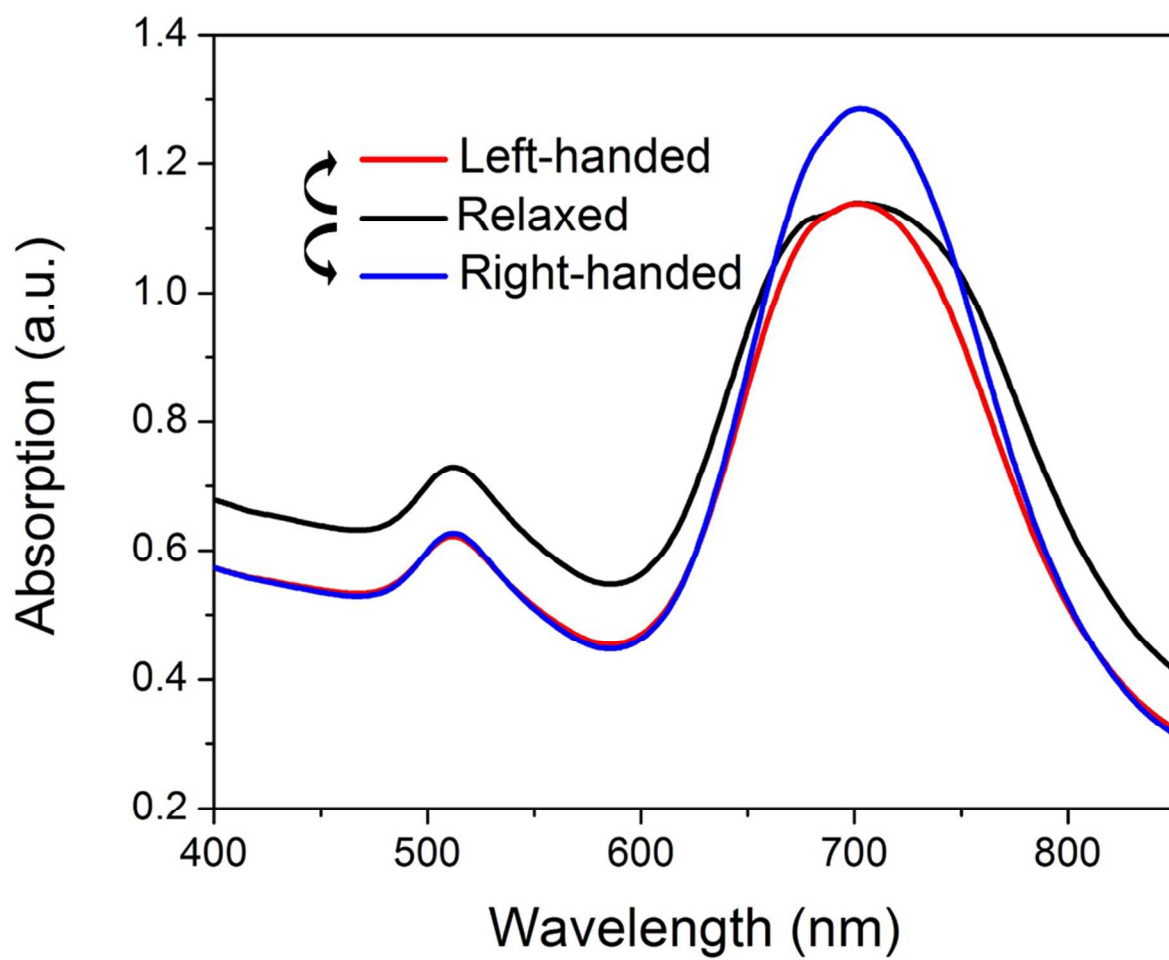

**Figure S12.** The experimental absorption spectra change after a single step reconfiguration of the AuNR superstructures from the relaxed state to the left-handed and right-handed state. No apparent aggregation was observed from the absorption spectra.

## Note S6. Theoretical discussions

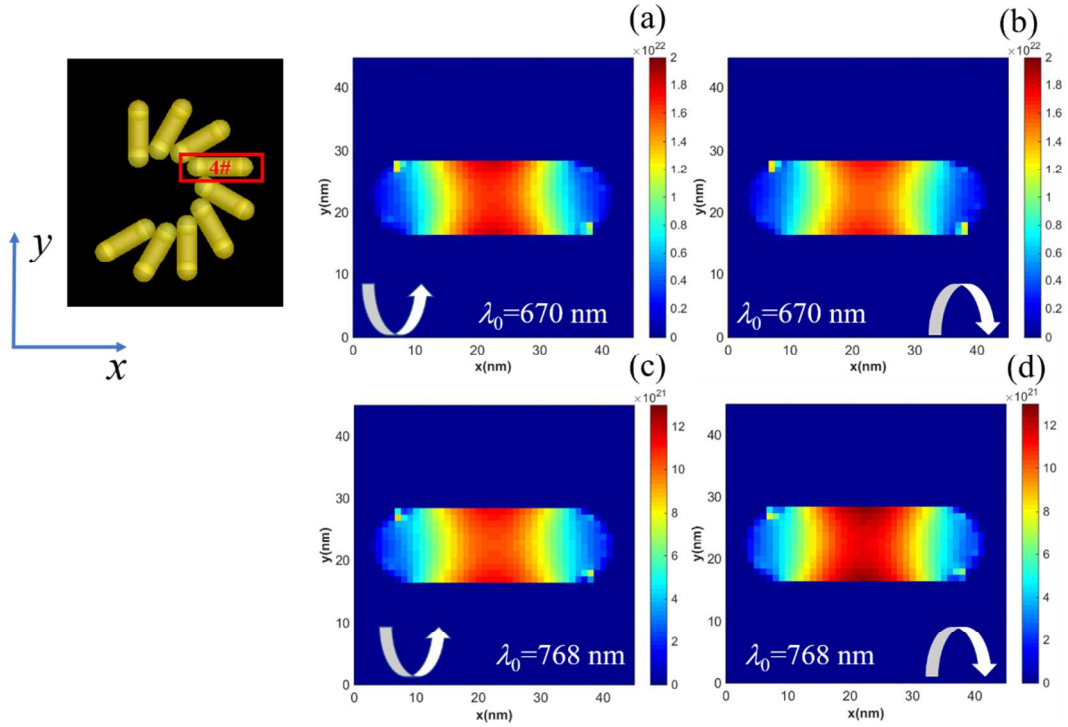

**Figure S13.** Power absorption maps (unit:  $\text{W}/\text{m}^3$ ) of the 4# AuNR (inset on the top-left) within a chiral supra-structure at  $\lambda_0 = 670 \text{ nm}$  (a, b) and  $\lambda_0 = 768 \text{ nm}$  (c, d) under LCP (a, c) and RCP (b, d), respectively. The handedness of the polarization is labelled with a rotated arrow. The  $x$ - $y$  cut plane passes halfway through the nanorod.

Figure S13 clearly shows the difference between the power absorption at the  $\text{CD}_{\text{max}}$  wavelength  $\lambda_0 = 670 \text{ nm}$  (a, b) and  $\text{CD}_{\text{min}}$  wavelength  $\lambda_0 = 768 \text{ nm}$  (c, d). CD spectra can be understood by the absorption differences between the LCP and RCP, with negligible contributions from scattering. In Figure S13, absorption per unit volume can be defined by the following equation<sup>7</sup>:

$$P_{\text{abs}}(\omega) = \frac{1}{2} \omega |\mathbf{E}|^2 \text{imag}[\varepsilon_{\text{Au}}(\omega)] \quad ,$$

(2)

where  $\omega$ ,  $|\mathbf{E}|$ , and  $\text{imag}[\varepsilon_{\text{Au}}(\omega)]$  denote angular frequency, amplitude of electric field, and an imaginary part of permittivity of gold. Note that the absorption difference of the individual nanorods in the  $x$ - $y$  plane (e.g. a, b) only takes up a small percentage of the overall extinction difference, therefore the strong CD spectra are obtained due to the volume integral within the entire superstructures. Additionally, the induced surface current mostly flows along the  $x$ -axis, which enables the absorption to be dominant along the  $x$ -axis.



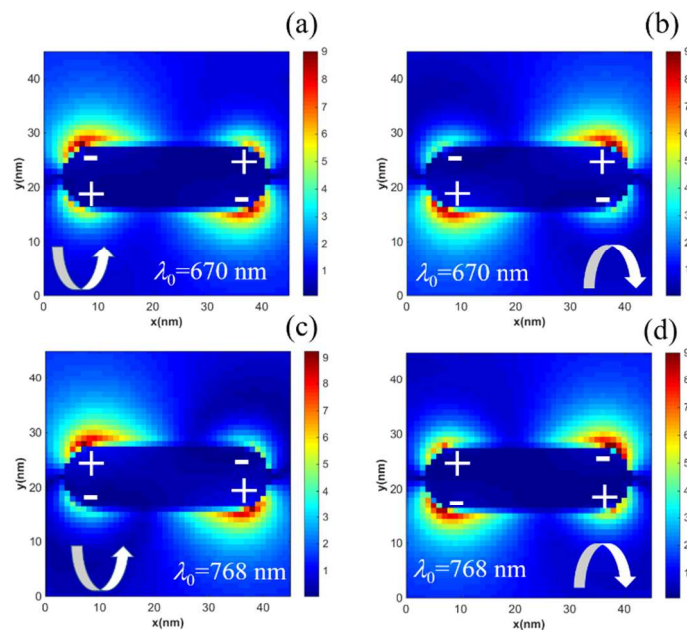

**Figure S14.**  $|E_y|$  field maps of the 4# AuNR (inset on the top-left in Figure S13) at  $\lambda_0 = 670$  nm (a, b) and  $\lambda_0 = 768$  nm (c, d) under LCP (a, c) and RCP (b, d), respectively. The map scale bar is normalized with the source intensity. The handedness of the incident polarizations are labelled with a rotated arrow. The  $x$ - $y$  cross-section passes halfway through the nanorod. The '+' and '-' signs denote the positive and negative values of the real ( $E_y$ ).

In order to analyze the electromagnetic mode that was oscillating in the individual AuNR,  $|E_y|$  field profiles were calculated as shown in Figure S14.  $|E_y|$  fields were the main components of the E-fields, which were the signature of the evanescent wave (along the  $x$ -axis) and the oscillating plasmonic modes. The direction of the fields was evaluated with the real ( $E_y$ ) (denoted by the sign '+' or '-' in Figure S14). When comparing Figure S14 a&b at the wavelength of 670 nm ( $CD_{max}$ ), it is evident that chiral field patterns had been generated. The stronger source-induced net dipole moment was along the  $x$ -axis in Figure S14a by evaluating areas with  $E_y$  fields that had oppositely paired signs. Likewise, when a comparison was made between Figure S14 c&d at the wavelength of 768 nm ( $CD_{min}$ ), the stronger net dipole moment was confirmed in Figure S14d. For dipole-light interactions, only the net dipole moment along the  $x$ -axis in the 4# AuNR was responsible for the coupling of the  $x$ -polarized component of the incident LCP or RCP. This coupling gave rise to the different absorption (CD effect). The stronger power absorption maps as shown in Figure S13 a&d, as compared to those in Figure S13 b&c, respectively, could be explained due to the coupling as well.

## Note S7. DNA design and sequences

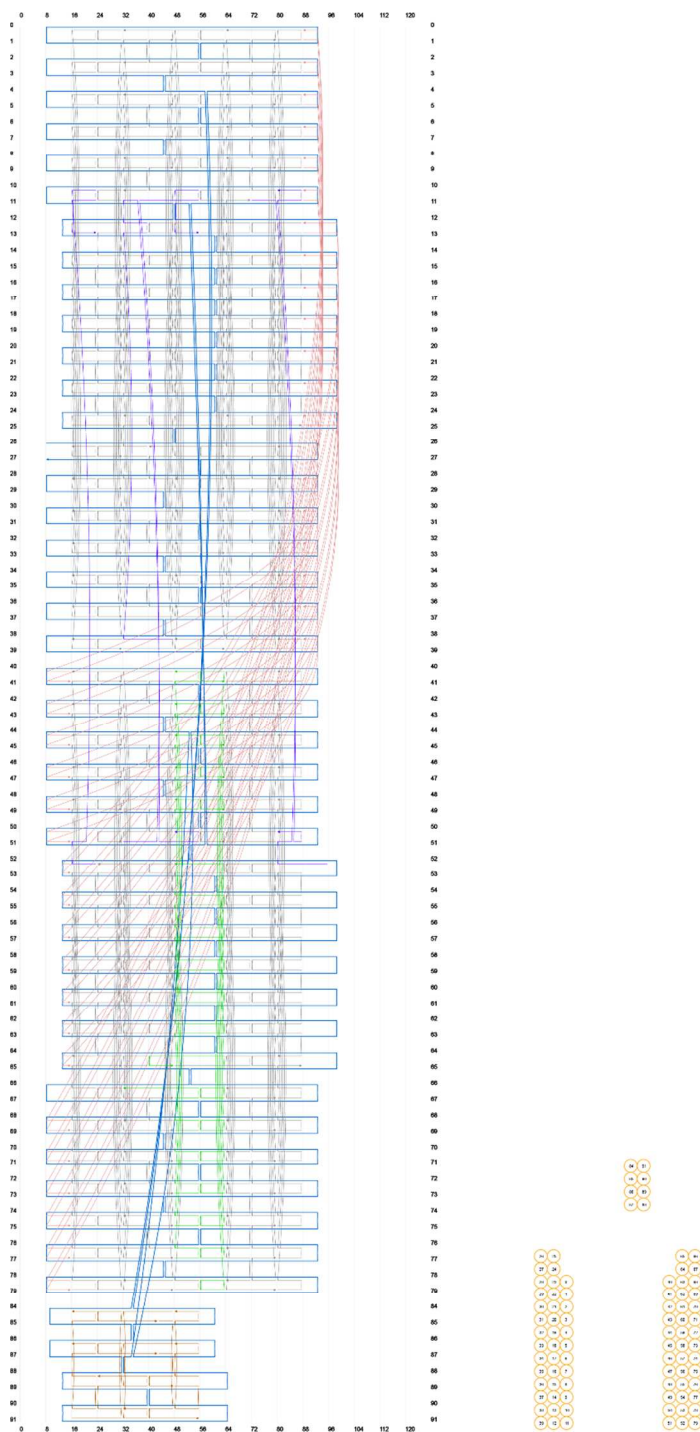

**Figure S15.** A strand diagram of the folded-state DNA origami. Inset at the bottom-right is the end view of the numbered DNA helices. The purple colored strands are the hinge strands that bridge the arm and the spacer. The green colored strands are the handle strands for the AuNR attachment. The brown colored strands are the helper strands for the 8 helix-bundle spacer. The red colored strands are the connector strands that were used for the hierarchical self-assembly.

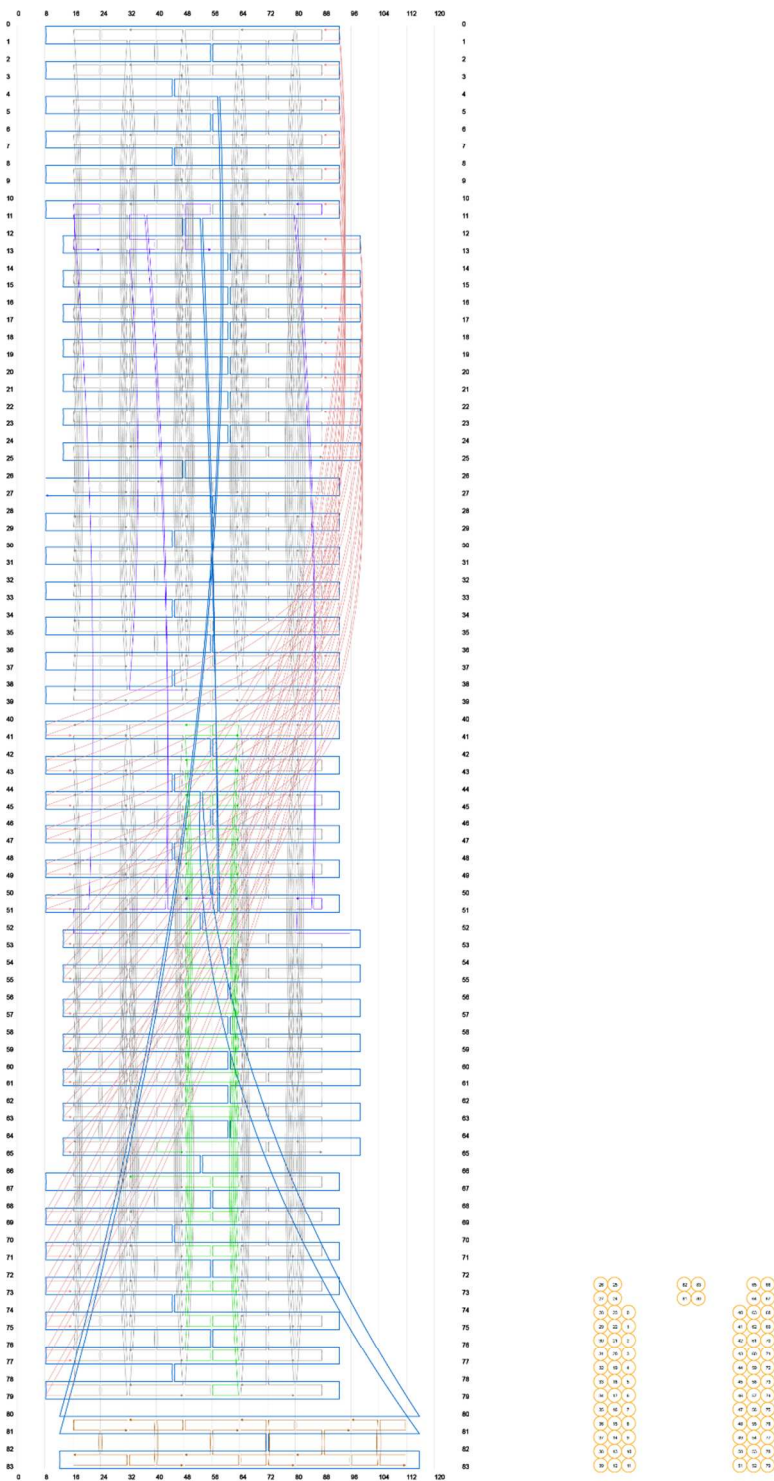

**Figure S16.** Strand diagram of the extended-state DNA origami. Inset at the bottom-right is the end view of the numbered DNA helices. The purple colored strands are the hinge strands bridging the arm and the spacer. The green colored strands are the handle strands for AuNR attachment. The brown colored strands are the helper strands for the 4 helix-bundle spacer. The red colored strands are the connector strands for the hierarchical self-assembly.

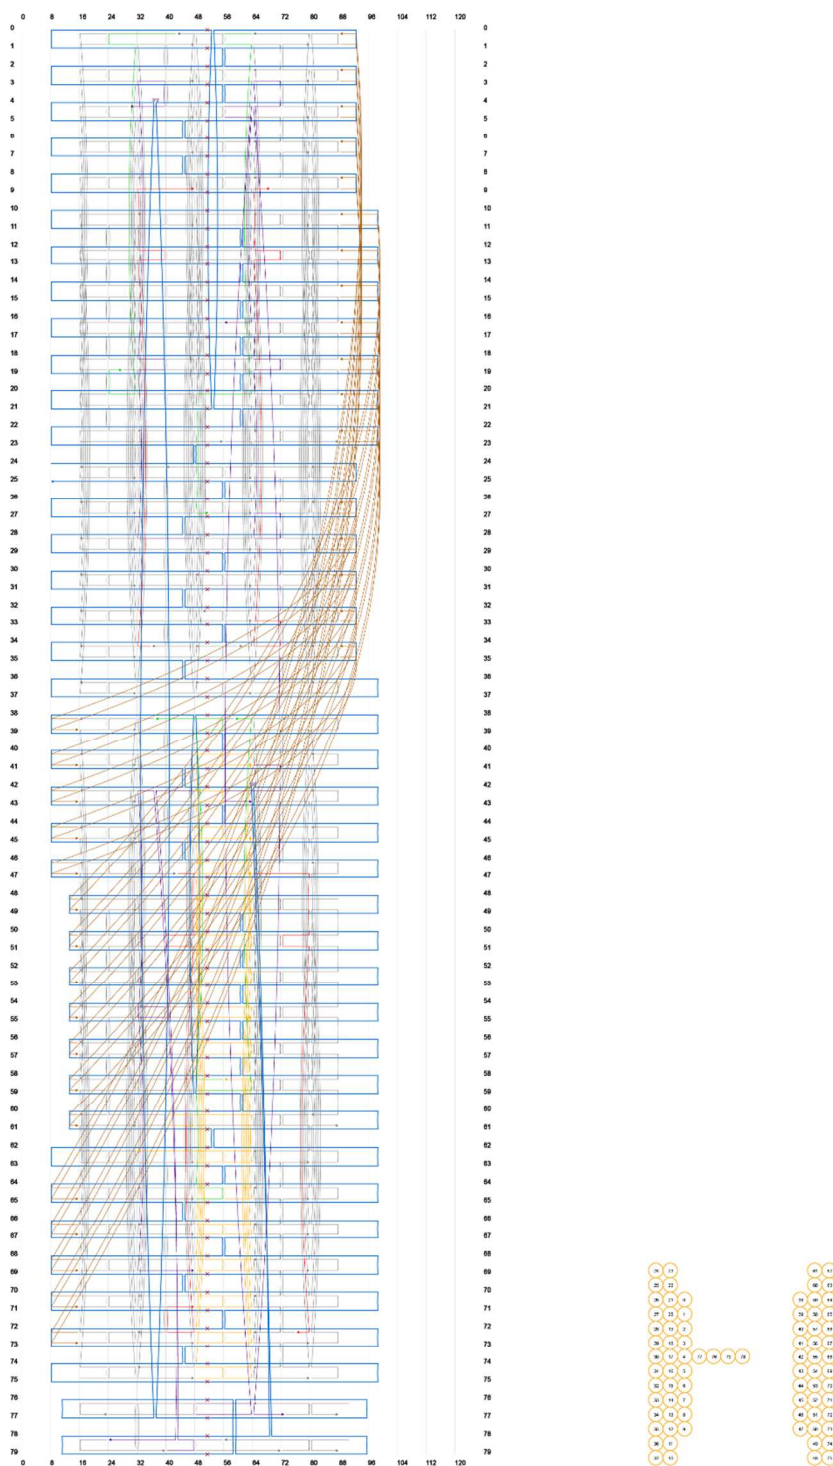

**Figure S17.** A strand diagram of the H-shaped DNA origami. Inset at the bottom-right is the end view of the numbered DNA helices. The red and green colored strands are the touching strands at the two ends, respectively. The purple colored strands are the hinge strands that bridge the arm and the spacer. The orange colored strands are the handle strands for AuNR attachment. The brown colored strands are the connector strands for hierarchical self-assembly.

DNA sequence for the capping strands that were modified on the surface of AuNRs:

5'- GTG AGT ATC TGG ACT GC/Thiol/-3'

Scaffold strand: home-made M13mp18

DNA sequences for the helper strands used in forming the V-shaped DNA origami (Figure 1B in the main text) and those of the lock and key strands used in the reconfiguration.

| <b>Function</b> | <b>Sequence</b>                                                   |
|-----------------|-------------------------------------------------------------------|
| hinge           | CCTGTAGCATTGCTGCGCAACTTCCGGAGGGGAAGATCGCGATTAA                    |
| hinge           | GGGCGCATAAAAATCCAAT                                               |
| hinge           | TTTGTCTAGTACAAAGCGCCCGCTTCTGCGCCAGCT                              |
| hinge           | CCGTCCGATTCTCCGTTATGTCGTAACCGAGTTTGAG                             |
| hinge           | CATAGAACTCAAAGTAGGGGATGTGGGCGATCTTCAGCCACAGACAGGGGTCAGGGAT        |
| handle          | CCA GAT ACT CAC AGTTGATTCTGTAGCTTCAACCATCGCCACGAAGAGAAGATTTTAGC   |
| handle          | CCA GAT ACT CAC ATTTTAAGATATTTCAAATACGTAATGCGCTAACCGCCACATAATCA   |
| handle          | CCA GAT ACT CAC CCCTGTAATTAGCAAATGTACAACGGAGATTGTATCATCGAGGGCGC   |
| handle          | CCA GAT ACT CAC TGGCTTAGCTCCAACAGCACAAAAGGAGCCTTTAAGAATAGATTAGGA  |
| handle          | CCA GAT ACT CAC CAAAAGAGAGCAACAAAAAAGGCTCTTAGTGTGATACTTTTCA       |
| handle          | CCA GAT ACT CAC GAAGCAAATTAAGAGGCTGTTTCAACAGTTTCCCTCATTTAATAAGGC  |
| handle          | CCA GAT ACT CAC ATATAATGAACTGGCTAGCAGCGAAAGACTGGGCAGAGGGCGCCAACGC |
| handle          | CCA GAT ACT CAC CATAGTAAAGCTTAATGACAATGACAACAGAAAGTATAAAAAACACCGG |
| handle          | CCA GAT ACT CAC GGC GCGAGAGTAATCTGCGCGAAACAAAGTGTGGAGGTTGCCCTCAGA |
| handle          | CCA GAT ACT CAC TCATCAAGTACGTCAATCATAAGGGAACCGAA                  |
| handle          | CCA GAT ACT CAC TCAGAAGCTTAAACAGTTGACCGTAATCCCTC                  |
| handle          | CCA GAT ACT CAC GCAAAGAACTGAAAAGCTACACTACGAAGGCATTCCAGTAAGGCAGGT  |
| handle          | CCA GAT ACT CAC GTTTAGCTCCCAATTCGTGATCGGAAACGACATCTTTTAGCGTCAT    |
| connector       | ACGTAACAATCGA                                                     |
| connector       | AAATCCTCGGATT                                                     |
| connector       | ATTATTCGTCACC                                                     |
| connector       | ACATTTAACAAAAT                                                    |
| connector       | TGATGGCAATTGAC                                                    |
| connector       | AAATTTACATCGGG                                                    |
| connector       | AATACGAACCGCC                                                     |
| connector       | ACCACATTTAAG                                                      |
| connector       | CATTACGAGAGGG                                                     |
| connector       | AAAACCAACCTTT                                                     |
| connector       | GAGCAGTTTAATT                                                     |
| connector       | TCTACGTTACGCA                                                     |
| connector       | AGTGCCGTAAAAT                                                     |
| connector       | CTATGCACGTAAAA                                                    |
| connector       | AGGTATTCATTTCA                                                    |
| connector       | TAATAAGTATCAA                                                     |
| connector       | CATGACAATAAT                                                      |

|           |                                                   |
|-----------|---------------------------------------------------|
| connector | TAACAGTACCTGAC                                    |
| connector | CAGCATATTCTGA                                     |
| connector | CTTTCAATAGTGAA                                    |
| connector | TGCATAAATACTGC                                    |
| connector | TGCTTCTGTAATTG                                    |
| connector | TTGAGATGTGTAG                                     |
| connector | CGCCATCAATATAA                                    |
| connector | GAACCTATAATGA                                     |
| connector | GGCAATTTAACGG                                     |
| connector | CACTCAAGCTGCT                                     |
| connector | CAGAGGCGAATGAG                                    |
| connector | AAGAAAATAAAAAC                                    |
| connector | GTGTTTCATTTGAA                                    |
| connector | TCAAAATTATTTAAA                                   |
| connector | GAAATCGTCGCTAT                                    |
| connector | TTTGAATTAAGC                                      |
| connector | TAGCGTCCCTGCC                                     |
| connector | GCTGAGAAGAGTCC                                    |
| connector | GAAGCAATAGCGA                                     |
| connector | ACTGAGTTTTACA                                     |
| connector | CACCCTCAGTGGC                                     |
| core      | TCAACAGTTTCTTACCAAGCCCCATAAAAATTCGGTCAGGACCAGACCG |
| core      | CGAGGAAATAACGTCAGAAGCATAAAGTGACATAAAACAGTAATGCGC  |
| core      | ACATGGCTATTTACCGCCAACCTATATACCAATGACAAGAGCTGACCT  |
| core      | GAGTAGTAAATCATTGAGAGGCTTCGCTTTTGCCCCCTGCAGTATTAA  |
| core      | GCCACCACACCCTCAGGATAAATTGCCTGAGATGCGAACGCATATAAC  |
| core      | TTTTTGTTTATCAACACGTGCCAGCTGCACTTAACCTCAAACCCGCTG  |
| core      | AACAGTGCCCGTATGCGGGTAGCAAACGGGTAATTGAAACACCAGAAC  |
| core      | CAAATGCTAAAGCGGATTTGCTAAACAAGTAGCGAGAAAAATCTTAGG  |
| core      | TGTTTTTATCCATCACAGGTCGACTCACGACGGAGTTAAGGCCAGCTT  |
| core      | AAATGTTTCATAAATATCTAAAGT                          |
| core      | GCCGCTACCACCACCAACGCGCAGACGGGCTTGAAGCCGAACCTCC    |
| core      | GAACTAACAAGAAAAATTAAGGCTGAGGACTGGTCAGTGTGTACTGG   |
| core      | TTACCAGATGCAAAAAGAAAGAACGTAAATGAACCCATGTCTACAACG  |
| core      | AGAGTCTGTAATCAGTTAATCATGACGAGCCGAAAATGAAGAAACGAT  |
| core      | TTCTTATAACAAGAATTGTTAATGAATCGGCCCGCCGCGATATCTTT   |
| core      | CAACAGTGGCAGAAGAAACATCAAAAACAGTATAACGGAAGATAGCCG  |
| core      | CAAACGTACGCAATAACATGAGCTCGAATTCGGAGGCCACAGGTGAGG  |
| core      | ACGTTGGGGGAACAACGGTGCCTGCAGCTTGACAGTACCAAGTATAGC  |
| core      | TCAGAGGGCAAGAATTTTGTAAGGCGAAAAGTCGGCCTCCATTGCA    |
| core      | GTTTAAACAGTTAATGCGGGATCGATATATTCATTATTACAGGTATGA  |
| core      | TAATAGTACATCCAATGGGTGAGATATTTTAA                  |
| core      | TAAGAGCATACCAGAAATCCCCGGGTACCAAATTAGTCTTGAGATAGA  |

core AAATATCGCGAGCTTCGCTCATTTAACGTTAAAAAGCCTATATGCGT  
core CCAACATGGGAACCAGAGGTCATTAATGCCGGAAATGGTCAATTCTAC  
core TAAATCCTTACAAACAATGGAAGGGCGTAGATGAACGGGTGGCTGTCT  
core ACAGGAAAAACGCTCAGTTGGGAAGCTGCAAGGCACTCCACCCAATAA  
core TATTATTTTGCCAGTTCTACTGCCGTATTGGTGTAGCGGAGCGGGCG  
core TCTAAGAAAAGATATAGGCCCCAGCGGGTTGAGCTACGTGAGAAAAACC  
core AGAACTGGACTCCTTAAATTAATTATTACCTGAGAGCCAGAAAATCTA  
core GGAATCGTAGACTGGAAGACGTTAAACTAAAGACCCTCAGAGTACCGC  
core TTGTCATTGAAAATACGAATAAAGCCTGGGGTGTATTAACCTTAATGC  
core AAGTACCGGAACAAGCCTACCATATCCTGATTACGTTATTGTTTGAGT  
core TTAGCGGGGACTCCTCCATAACCGTCACCCTCCATTATACCTTATGCG  
core TGTACAGACTTTGAAACTGCTCCATGTTACTT  
core AATCATAATACCGACCAATTTTTGTGGCCTTCAAGCCCGATATTATAG  
core AACCACCACCACGCTGAGCAAAAGAAGTTACAACGGAATATCCCATCC  
core GCGGAATTGGAACAAAACCTCGTAT  
core AGCAAGCCGCCACCACAGCGGAGTAAATCTCCCTATCATATTACGAGG  
core CCGGAATAGGTGTAATAATTGTAGTTGCGCCTGCGAAAGATTCATCA  
core AAGCATCACAAATATCTTAACGGATTCAGATGACAATAATCATTAAACC  
core TTCACCAGGACCTGAATTTCCCTTTGTGAGTGAGTAAGCATACCCAAA  
core CGGCTAAACAGGAGGCCACAACATGTCATAGCGAATTAAGTGAACAAC  
core GCAGATACTTAGGAATTTCTTAAAAGGCTTGCAACATGAACTATTTTCG  
core TTGGGTTATATAACTAGGGAACAACATCAACAACCCTGACAAGACTTC  
core TCCAGTTTGAACAAGCAAAGGGCACCATCAC  
core CGACGGCCTTAGTAATACCGTTGT  
core CGCGTAACAGGGCGCGCAGTCGGGAGTGAGCTCCAAATAAAATAGCAG  
core AGACGTTTTGCGGGAGAAGCCTTTCCTGAGTAATTAAGCACAGGCAAG  
core TTGCTGAGTAGATCTTTTCCAGTCTAGAGGGGAACCCTGAACAAAG  
core TATACAAAAGGGCTTAGTACCCCGAGAGAATCTTTCATTTCAGTAGATT  
core TCCGGCACATTCGCCAGGTGCGGGCCTTTCGACCGCCAGGCTGGTAA  
core AAATCACCTAATTTAGAGCAAACAGTTGATAACAACATGTTTTGCGGA  
core TAGTTTGACATTTTCGAGAGGGTACCATCAATCCGCCACCCAGAGCC  
core TTTATCAATGAAATGGTTGGCAGA  
core GAGGCTTTCGACGATACGAATAATCTTTCGAGTTGATATAGGCGGATA  
core ACGTGGCGAGAAAAGCGCCCTGAGTGATGGTGACCGCGCCAATAGCA  
core AGATTAGTGAATCTTAGCGGTTTGCCGCTTCTACTATGGTCGTTAGA  
core TAATTTACAAACCAATATATACAGCAGAAATAATAATACATAGAAGTA  
core TACCTTTATTGATAAGAAGATTGTAATCATATATTGAGAATAACAACG  
core TTAGACTTTTGGCCGAGTTTGGATATTCCTGATTATCAGA  
core CATTTCAGTCCAAATCACACTCATCTCGAAATC  
core GAGCCGCCCTCAGAGATGATATTATCAAAAAAATCATAATAAAGCC  
core ATTAAGACTAATTAATAGCGTAAGACAGACAA  
core GTTTGAAATTACTAGATATTTTGTAACAGGAGGTCATTTTTAAATA  
core AGCCGGAACGCCTGATATAGGCTGACCGGATA

core CATCGTAGCATTCCAATTTCTTCACCGCCTGACTAACAAGGTGCCGT  
core ACCCTTCTTCACACGACATAGCGAGTCTGAGAGTGTAGAT  
core CTGACCAACCAGGCGCAAATTTGTGTTGACCCATATTCACAAAGCGCA  
core AGCGCATTGAGAGAATTCGCTCATTAATTGCTGCTTTCCTTGCTTTG  
core AGGGGAAGGGAAGAAACACCAGTGGGGGAGGCCAACGCTAACGAGAT  
core TGCAACTATCTGGAAGGATGAACGAGGCTATCAGCCACCACTCCCTCA  
core TCAACTTTAATTGGGCTTTTTTCATAGAATACACAGAATGAAAACAAAT  
core TTTATCCTTGCTATTTGGGTGGTTGTCCACGCCGGGAAAGGGAGCCC  
core AAAGCACTAGTTTTTTAAATCAAATTAAGACAGAAGGA  
core TATTTTTGAGCCCTAATTTAATGGGAAAACAATTACGCAGAGGTGGCA  
core ATCAGAGCGGGAGTCAGCCTAATGAAACCTGTATAGCGTCTTTCCAGA  
core CAGACGATTGGCCTTGCCAGCGATAAACGAAACTTGCCCTGACGATGG  
core CCCTCAGACAATAGGAATTTTCTGCGTAACGATTCATTGAATCCCCCT  
core ATAACCCATAATTGAGAAGCTTGCGTGTGAAACCAGAATCGGGATTTT  
core TTAGAGCCAGGAAGGTGTTAACGTCGCCTGAAAATAATAAGTTTATT  
core CCAAATCAAATCGGAATCCTGTTAGAGTTGCGTTTTAGCTTAAATCA  
core CGCAAGACTTAGTTAATTCGCGTCTTAAATCAAAGCGAATTAGAGAG  
core TTGACGCTCAATCGTCAATCATAGTAGCTTAGGGGACGACCAATAGCT  
core TCCAACGTAGTCCACTAGAATAGC  
core CGACTTGCGAATCATTGTTCCGAAATCGGATAATTCGACACTAATAGA  
core ATGCAATGATTTCAACACCAAAAACATTATGA  
core GCCTAATTATCCCAATAACTCACACAATTCCACGATTAAACTGAGAAG  
core TGACAAAATCCCTTATGGGGTCGAGAAACCACACGTGGAC  
core AACATTATCATTTTGCATCATCATTATACTTC  
core GTTATCACCGTACTCACACGTTGAGAGAATAGAAGTTTTGCCAGACAT  
core ACATATAAAAGACACCAAATCGCGAGAAACAAGGTCAGTTCAGTTGAA  
core CCTTTACAAGACGGGATGTTTCCATGCCTGCGCAAATTAACATCAC  
core GAACTGATAATGGCTATCAATATAAGAATCCTTGAAATAGGACAGTAT  
core GTTGGAACCAGTAATCCTACATT  
core AGGAATTGGTCAATAGAAGAAATTGTTAGAACAAGCCGTTTTTATTTT  
core GTTGAGATATAACGCCTCAGCTTGAATTTTTTGGAGGTTAACCGCCA  
core GACCATAAAGGTCTTTTTAAATGTAAAAATAATTCATCTATTTAATG  
core TCAGAGCATCGGTTGTGCAAGGAT  
core TTCATTACGAATAAGGGAGGCAAAGAGGAAGTTACAGGAGCCTTGAGT  
core GAGGCTGAGTTTTGCTTACCGATATCGGTTTAAAAAGGAAACCCTCGT  
core ATAGTTAGTATGGGATTTGGGGGGTAATAGTA  
core GCCGCCAGCATTGACAAGGTAAAGCAACCGTTGTGGCATCAATAACCT  
core AAGTCCTGGGGAGGTAAACAGCTGATTGCCAGTATCTAAAATATCAAA  
core AACAAAGTAGAAACAATGAGTAACGCCAGGGTGGCCAACACGAGTAAA  
core AATATATTAAGAACGCCAGCTTTACGGCGGATTGAGAAAACGAGAAT  
core ATCTTACCTTAAGAAAAATAACCTTTACCTTTAACATCGCACCGAACG  
core CGGCCTCATCACGTTGGACTACCTTTTTAACCTGGAAATAAAAAGGGA  
core AGCAAATCCGCGAGGCAGCAAGCGTTTCTTTTTCGAAAGGTCACGCTG



core GTCTCTGATTTGATGATTCCATTAACGGCTACTGAATTACCAGTCAGG  
core CCGAGATAAGGCGAAAACCCTAAAGCCGGCGA  
core CCCTCAATCCTTGCTGTGAATACCAAGATGATATACATAATATGTTAG

L1 GCGGTCGTGACA TAGCGTCATAGCGACAACAATAAAAGCTAATG  
L1 TCAGTACTCACG CCATTAGCAAGGCCGGTCAATAGAAAAAGGGCGACTGTCCAGA  
L1 CAGTCAGCATT AATTATCAGACGGAAATGAGGGAG  
L1 GTTACATGTTTCG CCGACTTGAGTAGCACCAAAGACAAATTCAT  
L1 TCCTACCTGAGG GGTAAGTAATTCATTGGGAATTATAGCCCCCTAAAGGTG  
L1 AGTACTTTCAGA CAGAACGCGCCTGCAAAAACGTCAGAGCCAGC  
L1 GTTTCTACCTCA CGACGGAATCAAGCCAATGAAACCATCGA  
L1 TAACATCCGTCT AGTAATTCGGTCATTTGCCTT  
L1 GATAGGTCTAAT TCGGCATTTAAGAGAACGACAAAA  
L1 TCTTTGGCGGAT AAAATCACAGCCATTTCAACCGATTTATTCATTTATTCGAGCC

K1 CAT TAG CTT TTA TTG TTG TCG CTA TGA CGC TAT GTC ACG ACC GC  
K1 TCT GGA CAG TCG CCC TTT TTC TAT TGA CCG GCC TTG CTA ATG GCG TGA GTA CTG A  
K1 CTC CCT CAT TTC CGT CTG ATA ATT TAA TGC TGA CTG  
K1 ATG AAT TTG TCT TTG GTG CTA CTG CAA GTC GGC GAA CAT GTA AC  
K1 CAC CTT TAG GGG GCT ATA ATT CCC AAT GAA TTA CTT TAC CCC TCA GGT AGG A  
K1 GCT GGC TCT GAC GTT TTT GCA GGC GCG TTC TGT CTG AAA GTA CT  
K1 TCG ATG GTT TCA TTG GCT TGA TTC CGT CGT GAG GTA GAA AC  
K1 AAG GCA AAT GAC CGA ATT ACT AGA CGG ATG TTA  
K1 TTT TGT CGT TCT CTT AAA TGC CGA ATT AGA CCT ATC  
K1 GGC TCG AAT AAA TGA ATA AAT CGG TTG AAA TGG CTG TGA TTT TAT CCG CCA AAG A

L2 TACAACGGTTAT TGACGGAATTATTCAGGAATTAGCATGTTCA  
L2 GCCTAGAATTAC TGTCAGACGACGACAAAAGACAAAGTAAATAT  
L2 ATAGCCCAGTAT TTTCGGTCATAGCCCCAGCCAGTAATCGATAG  
L2 GCGTTGAACGCT TGGTTTACCAGCGCCAATAAACAAAGCCAGCA  
L2 ACTCTTGTAGTT CGACTTGAGCCATTTGTTAAAGGTAATTCATA  
L2 TTTCTCTACAGC AGCGTCAGGATTGAGGCATTACCAAGTAATTC  
L2 AATCATGAGTGC ATATAAAGTACCGACAGCGTTTTCTTGCCTTT  
L2 AGCGGTCTTACG GCCGGAACGTCACCAAATCAAGTATCGGCAT  
L2 GCGTGACACTCC TAATCAGTAGCGACAGATGAAACCATAAGAGA  
L2 TCAATCGCATGT AAATCACCAGTAGCACGAGGGAAGAGGGCGAC  
L2 AACGACGAGCAG GCTAATGCAGAACGCGCAATAGAAGAATTATC

L2 GCGAATAATACC ATTCAACCACTGTAGCAAAGGTAATTAGCAAG

K2 TGA ACA TGC TAA TTC CTG AAT AAT TTC CGT CAA TAA CCG TTG TA  
K2 ATA TTT ACT TTG TCT TTG TCG TCG TCT GGA CAG TAA TTC TAG GC  
K2 CTA TCG ATT ACT GGC TGG GGC TAT GAC CGA AAA TAC TGG GCT AT  
K2 TGC TGG CTT TGT TTA TTG GCG CTG GTA AAC CAA GCG TTC AAC GC  
K2 TAT GAA TTA CCT TTA ACA AAT GGC TCA AGT CGA ACT ACA AGA GT  
K2 GAA TTA CTT GGT AAT GCC TCA ATC CTG ACG CTG CTG TAG AGA AA  
K2 AAA GGC AAG AAA ACG CTG TCG GTA CTT TAT ATG CAC TCA TGA TT  
K2 ATG CCG ATA CTT GAT TTG GTG ACG TTT CCG GCC GTA AGA CCG CT  
K2 TCT CTT ATG GTT TCA TCT GTC GCT ACT GAT TAG GAG TGT CAC GC  
K2 GTC GCC CTC TTC CCT CGT GCT ACT GGT GAT TTA CAT GCG ATT GA  
K2 GAT AAT TCT TCT ATT GCG CGT TCT GCA TTA GCC TGC TCG TCG TT  
K2 CTT GCT AAT TAC CTT TGC TAC AGT GGT TGA ATG GTA TTA TTC GC

DNA sequences of the helper strands used in forming the H-shaped DNA origami (Figure 5 in the main text) and those of the touch strands, block and release strands used in the reconfiguration.

| <b>Function</b> | <b>Sequence</b>                                                 |
|-----------------|-----------------------------------------------------------------|
| hinge           | ATATCAAATGTTTGGAGTAAATCGTTAAGACGGTTTGCCTTCGGCCAAAGATAGCCG       |
| hinge           | ATGAAAAGAGTCTGTCCACCCAGCACCTCCCGATAATAAGCTTACCCTCAGGAA          |
| hinge           | GGATTGACCAGCTTTAAGTTTCGAGCTAAAAGATTATGGCTTTTGATGAAG             |
| hinge           | ACGTAGCAAAATTCATCAACATTAATGTG                                   |
| hinge           | GAACTTAGGTCACGTTTAAAGAAAAGTAAGCCGCGGGTTGCGCTCGTTCACTC           |
| hinge           | AGTTTATTAATAAATTCGGCAACATATATATTTTG                             |
| handle          | CCA GAT ACT CAC CGAAAGAGACTAAAGATCGCACCATTACCATTAGCAAGGGAATCAAG |
| handle          | CCA GAT ACT CAC CCCTGCCGGAACAATATTATAGTCAGGGCAAACGTTAGTCAATCA   |
| handle          | CCA GAT ACT CAC GCCCAATATAGTACCGCTAATGCAGATACAT                 |
| handle          | CCA GAT ACT CAC GGAGGTTGGAACCCAAAACCAAAATAAAA                   |
| handle          | CCA GAT ACT CAC CGTAACATATTCGTCGTCATAAATATGACGATGAACCGGAGAGG    |
| handle          | CCA GAT ACT CAC TCACAAACGCTGAGCTTAATTGCTGAGGGAACCGATTACGGAATA   |
| handle          | CCA GAT ACT CAC GAATTGCCAAATAAAACCAGACCGGAATC                   |
| handle          | CCA GAT ACT CAC TATTCGGTGAGGTGAATTCAGCAAACCTCAAAGACACCGGGCGCG   |
| handle          | CCA GAT ACT CAC AATAGAAACGTCTTTCTTGTTTCATTGAATCCCTAGCATGAGAAGC  |
| handle          | CCA GAT ACT CAC CTTTGAGGTAAAGGCCTAAATATA                        |
| handle          | CCA GAT ACT CAC TTGCTTTCGAATAATATAAAAAGCAAAGCGGATTTGCGGAAAAGAA  |
| handle          | CCA GAT ACT CAC AAATCACGCACCTTTAGCGTCAGACTGTAG                  |
| handle          | CCA GAT ACT CAC AGTTTTGTCTGAGTTTATAGCGAGAGGCTTTTAAATGCGGTAATC   |
| connector       | GCATAGTATCATAT                                                  |
| connector       | AATCCAATCGCTGA                                                  |

|           |                                                   |
|-----------|---------------------------------------------------|
| connector | GACGAGAGACTACC                                    |
| connector | ACGAGTACATAAAAT                                   |
| connector | CATAAAGCATCAT                                     |
| connector | TGGCATTAAACATC                                    |
| connector | ATCATAGGTCTTTC                                    |
| connector | CGCCACCCCCACG                                     |
| connector | TAGTAGCAATTCA                                     |
| connector | GAAAAGACAAAGAA                                    |
| connector | CTCTGAATCGTGC                                     |
| connector | CCTGTTTACCGTT                                     |
| connector | TCGTGATGAAACAA                                    |
| connector | AAAAGCCTGTTACA                                    |
| connector | ACAGTCAAAGGAA                                     |
| connector | AATTGATCACCAT                                     |
| connector | TTAATGGAAACGTG                                    |
| connector | CCATTAGAAATAA                                     |
| connector | GATCCGACTCCTC                                     |
| connector | TAAAAATACCGACC                                    |
| connector | TTAATGGTTTGAAT                                    |
| connector | ACATTTAAATCGG                                     |
| connector | ACAGATACATTC                                      |
| connector | GTTTTGACAGGAG                                     |
| connector | ATTTGTATATTTT                                     |
| connector | CCAGCATTTCTTT                                     |
| connector | TTCCCTTAGAATTT                                    |
| connector | GCGGTTCAGAACC                                     |
| connector | ACGGGGTCAGCAT                                     |
| connector | GCAAAAGAAGAATA                                    |
| connector | GAGGCTGACCGGG                                     |
| connector | CCTTCCTTGAAAAC                                    |
| connector | CCGGAAGTGCCTT                                     |
| connector | AACCCTCAAGGAT                                     |
| core      | TCGGGAAACAGCTGCATTATCAAATAGCGATTCAGATGATCAATATA   |
| core      | AAAATATCCGTCAATAAACTTTTTTGTAATGAAGCCTGGCTTTCCAG   |
| core      | CTTCTGGTACTCCAGCATAGCAAGGAGTTTTCTTTGATTAAATTAAC   |
| core      | GAGATTTAGGAATACCCGGAACAATTTTCAGGGTACAAAC          |
| core      | TCCAACGTAGTCCACTATAAATCA                          |
| core      | CGAACTAAACATTCAACCACCTCAGAACCGC                   |
| core      | TTAAAATTTAAATTGTTTGCCTGTTAATCACAGACGTTTCGATCTAA   |
| core      | GAAATTGGCTAACTAACCAAGTACCGATAAATTCGACACTAATAG     |
| core      | GTAAAGATTCAAAAGGGTCCAATAAAGTTTTGTTAGCGGGTTTTTAC   |
| core      | GAATGGAACGTCATACAAGAGGAACAAAAATCGGATAAAATGCCTGAG  |
| core      | CAGAGATAATAAAAGGTATCCCATGGGTATTACACCATTTCGCCATTCA |

core ATTAGACTTTTAAAAGCTCCGGCTTAGTGAATTTAATGAAATTGGGCG  
core TATCGGCCGCCTGAGTTTTAGCGATAACAATTTAAAGTCAGGAATTAAC  
core TAGAATCAGGGATTTTCCAAATAATTTCCAGAAGACGGGAAGGGTAAT  
core CCAGTGCCTGTTTCATAAGTCCTGAATAGCACT  
core TTAGTAGAGTGTGATATTGAAAGGGGTTATCT  
core AAAGAATAATCCCAATAGACAGGATAATCAGT  
core CACCCTCACACCCTCACATTATTACGTTGGGAGATCTACAAGAGTCTG  
core ATCATATTACCACCAGAGAGTCAATAGGTTGGACTGCCCCGGGTGCCTA  
core CGGATAAGGGAATAGGACGAGGCATAGTAAGA  
core AACAGGGACCTTTACATATTTTGGCCGAGAAACGTGCTGAAAAACC  
core AGCTGAAACTATATTTAGCTCAACAGTTGATTAGAGCCACCATAATCA  
core GTTGAGGCAGCCGCCGATAAGAGACTAAAGTGCAAATGGTAGTTTGA  
core ACCACCAGAGGTCAGAAGTACCTTCGTTTTAACAATAAAGAAAACATT  
core AATCTCCACTTTAATTAGAACCGGACCAGGCGATCAATAGGCCAAAGA  
core GCAGAGGCGAATACCAGATGAATA  
core GATTGCCCGAGAGGCGCTGAACGCGAGGCGTAGAAGAAGTGAATA  
core GTAAAGTAAATGAATTTTCTTTTCAACACACCAGAATAACAAAGATTTTGTAAATAGGAA  
core ACGGAGATTCATCTTTAGGCACCAACCTAAAA  
core GATCGCGCCGAAATATTTTCATTATCATTCAATCGTCAGTCACACGACCAGTAGAAC  
core AGCGAGTAGGATTCTCCGTGGGAAATCGTAACCGTGCATCAGGGGACG  
core CGGGCCTCAACTGTTGGTCTTTCCCTCGTAGGACAACAGGAGAACAATA  
core GAGTAACAAAGTTTTACCATAAATGCCCGAAATTGTACCACCTCAGAG  
core CATAACGAGAAAGTGTACTGATGCATTTTAACTTTGAGTATTTGCGGA  
core CAAATATTCGATTAAGTCTCATTCTTGACAGTATCGGTACAGCTTG  
core TAAAGCCAACGCTCAGAGGCGGTATCAA  
core CACCCTCACGAGGGTAATCCGCGAAAAGTACA  
core AAGATAAAACAGAGGTACAGTAGGCCAGTAAT  
core AACGCCAACGACGATAATGGCTCAGTACCAGG  
core CTGCAGGTCGACTCTAGAGTACCGAGCACCTAAATCGCGAGAAGATAATACTTAGAAGT  
core CTGTTTAGAGGTGGCATGCGGATGGATTAGAGCGATTGGCTAAAGCCA  
core TTTGCATCACGCAGTAATAA  
core CATCACTTTTGCTGGTATATAGAAGCCGTTTTCCAGGCAAAGCGCATT  
core CCAGTAAGAGCGCAGTAAATATCGTAATTGCTCAATAAATACTAATAG  
core AACATCTGGTCAGTTGGCAACTTGCTGAAACACCGGTACCAGTA  
core ATCGAGATCCTTTGCTCAAAC  
core TGAACACGATTGTTTTTTGGTGGTCTTATAACGTCAAACCTACC  
core ATACCGATAACCATCGCTTTGAAAGGAACGAGGGGAAATTACGTCACCGACTTGAGC  
core TGCAGCAACTGGTTTGTACCTTTTACATCAAGTTTACATCATAACGGA  
core CTTTATTTGTAATACTTTGCATCATCAAAGCGATCCTCATCTTGATAT  
core TGAGCGCTTAAGCCCAACTTGCGGCAAATCAGAATATCCAAAAACGCT  
core AAGAGAAGAGTATTAAGTTTAGACGAAAACGAAAATGCAAATTTTGTAG  
core ACAAAGAACCTGATTAAGCTTAGATCGCTATTGAGACGGGGAGAGAGT  
core TAATGTGTAGGTAAAACCTCAAACCTGACCTAATACAGGAGTGTA

core ATCCTGATATTATTTGGTGAGTGAATTTGAATCCCCAGCAGGCGAAAA  
core TATAGCCCTGCCGTCGCTATCATAGGTAATAGCAATATGAGGCCGGAG  
core CCCAATGCGCGAACTGTTTTCGAGGCTTAATT  
core GAACGCATATAACATGTTTTACCACCCTCAGAGCTGC  
core GCCACCCTCTCAGAGCTCTGGAAGTGAAACCA  
core CTCCTTATTACATAAAGGTGCGTCTGGCCTTC  
core GGCTGCGCTTCGCTATACGAGCATAACGCGCCCTGACCTGTTTGAATG  
core TTACCAGAAAGGAATTTGTATCACCGTACTCA  
core CCAGGGTGTACCAGTAATTAATTCAATATATCACGTAAAAGAAATTG  
core CAAGGCAAAGAATCAACAGGTCAGGCTTAGAGGCTCGCCACCAGAACC  
core AATTGCGAATAGCACGTTATTCTAAGAGAAAGGAGCGCCCCGAACG  
core GCTATTAGTCTTTTCAAGGTAAAGAACAATAGCTGGAAAGGGGGATGT  
core AATTTAGGACGACAATACAATATTAAGCGTA  
core CCGCCTCCCAGAGCCAAATATGCAGTCATTTTTCAATTCTCATAACAGG  
core CATTGGGGATAAATTGTCAATCAGCTTTTGCAACCGATA  
core TTAGAGGAGGCCGATTAAAGAGCGGGAAATCCCTTATTAAGAAAATCGC  
core TACAACGCCTCATAGTTTAAGAACATGGTTTATAATCAGATGTATAAG  
core TATGTACCAAGAGAATATTACCTTCTACGTTACGTCACCAGATAGCAA  
core GTATTACATTTGACGCTCCAAGAACCCTAATTTTACGCCAGCTGGCTGT  
core AAGAGAATATAAATAACCTCAAATCAGTATT  
core CTGGTAATGTGCCCCGTACAGTTCATGGATAGCGTGAGAAATATTCAACCGTTCTAGCTG  
core AATTGAGTAATATCAGATTAGTTGTGCCAGTTTGTTTTTAACGGTACG  
core ACGACAGTATCGGCGAAGCCCTTTTGGTGTAGATGGGCGCCAAACGGC  
core CCTTATTACATCGGCAGCAGCACCGTAATCAG  
core ACAATGACCTGAACTATCCTGAATCTTCTTTATACTTGAATTATC  
core AACGCAATAATTTACCAGA  
core GCGTTATAGTGCCACGAAATCTAA  
core TTTGAAAGAATACACTAAAACACTTGTATCACTTTTTTCATACAGAGG  
core GAGGAGGGAGGGAAGGTAACGACATTCAACCGAACGGCTGACCTTTCTTAATTATCAGC  
core TAGCGACACCGGAAACCATCTTTTACCGGAA  
core TTCGCCTGATTGCTTTGAATTATTATTAATTA  
core GTTTTCCCGGATTAATAATGCAGGTAGAAACGATTCACCTGAAATGG  
core TAGAAAATACATACGCAGT  
core TTATTAATTTACAACTAACTATACAAATATATCACAATTGTAATCAT  
core TACAGTAATTCAGGTTACAATTTATAACCTTCTGGCCCTCAACAGCT  
core ATGACCCTCAACGCAAAGGTCTTTTGTCTTAAATAAACAGTATTCTGA  
core CGCCATCATTGTCACACATAGGCTTGACCAACCCACGCATGGGATCGT  
core CATGGAAATACCTAAAACAAGCAAGGCTTATCATAGCTATAGCAAGAA  
core GAGCAAACCCGGTTGAATTTCAACACGAGAAAGTTTCAGCACGTTGAA  
core CGCGTTTTGCGTTTGCCTACCAATTTCAATTCAGTAGATTTCAATAAC  
core GCTGCAAGAGTCACGATCCAGACGCAGAGGCAATAGCCCTACCAGCAG  
core AACAAAGAACGGAATACCCAAAA  
core GAGAATCGCCATATTTAACGAACCAAAACATC

core GAGGCCACCGAGTGAACGAGCGTCGAAACGATTAACG  
core ATGAGTGATTATCCGCTTTCAAGAAAAATAAGACATTCAACTC  
core TTTCCATTCACTACGAGACCCCA  
core TCCAGTTTGGAAACAAGCAAAGGGCTTCCTCGT  
core AGCATCACATCAACAGAATAAGGCATCTTCTGTGCAATCCCACACAA  
core AACATGAAGATTAGGACCAGAGGGACCCTCGT  
core CTGTAGCCGTAATGGGAGGCATGATTAAGA  
core CGTAGATTCACTACCTAAAACAAACATTTCAATTACCTGA  
core AACACCGCCTGCAACACAAATTCTAATCATAA  
core CAAAAGGGATATTGACCGCAGACGGTGTGCAAGCAACGGCTGAGGAAG  
core GGTCATAGCAAGCTTGAGAAGTACCGACAAAATCAATATGGCCAA  
core AAGAGTAATCAGTGAAATTTTTTCGGAGTGAG  
core CATCGAAATCGGCAAGCTAAACAGTTACAACGTGGAC

VL-touch ATTAGAGCTTTAGGAGTTAATTTTCGTTAAATACATGC GCAA GACGGTCCAC TGTTGCGAAG  
VL-touch GTG GAC CGT CTT GC GTAGCTATTTTTGAGAAGAAAAATATGCGATTTAGC  
VL-touch CCTTTGTTTATCTAATTCTGCGTTGTAAAACGACGG GCAA GACGGTCCAC TGTTGCGAAG  
VL-touch GTG GAC CGT CTT GC ATAAATGCAAAGCTGCGGAAGAACCTATTTAATGCC  
B1 GGCCACGCTCGG C TTC GCA ACA GTG GAC CGT C  
R1 T CCA CTG TTG CGA AGC CGA GCG TGG CC

VR-touch ATGCTGTTCAATTTGCCAGCAACCCAATTCTGCTTT GGCT CGCGACGGAC TCGATGTCGA  
VR-touch GTC CGT CGC GAG CC TTTTCTGTTTTTCACCGCGCTTACCAACGCTAAGGG  
VR-touch AGGGAGTCGGAACCAATCACCAGTAGCCTAATTATTT GGCT CGCGACGGAC TCGATGTCGA  
VR-touch GTC CGT CGC GAG CC TTTTCAAAAATGAAAATAGCAGAGCGCATTGCCTAATTCTAT  
B2 CTAAGACGGCGT T CGA CAT CGA GTC CGT CGC G  
R2 C GGA CTC GAT GTC GAA CGC CGT CTT AG

## References

- (1) Lan, X.; Su, Z.; Zhou, Y.; Meyer, T.; Ke, Y.; Wang, Q.; Chiu, W.; Liu, N.; Zou, S.; Yan, H.; Liu, Y. *Angew. Chem. Int. Ed.* **2017**, *56*, 14632-14636.
- (2) W. Yu, and R. Mittra, "A conformal finite difference time domain technique for modeling curved dielectric surfaces," *IEEE Microw. Wirel. Compon. Lett.* **2001**, *11*, 25-27.
- (3) A. Kuzyk, R. Schreiber, H. Zhang, A. O. Govorov, T. Liedl, and N. Liu, "Reconfigurable 3D plasmonic metamolecules," *Nat. Mater.* **2014**, *13*, 862-866.
- (4) P. B. Johnson, and R. W. Christy, "Optical constants of the noble metals," *Phys. Rev. B.* **1972**, *6*, 4370-4379.
- (5) S. A. Maier, *Plasmonics: Fundamentals and Applications* (Springer: New York, 2007).
- (6) Gerling, T.; Wagenbauer, K. F.; Neuner, A. M.; Dietz, H. *Science* **2015**, *347*, 1446-1452.
- (7) L. Novotny, and B. Hecht, *Principles of nano-optics* (Cambridge university press, 2012).
